1 **Defective flow-migration coupling causes arteriovenous malformations in**  
2 **hereditary hemorrhagic telangiectasia**

3

4 Hyojin Park<sup>1</sup>, Jessica Furtado<sup>1</sup>, Mathilde Poulet<sup>1</sup>, Minhwan Chung<sup>1</sup>, Sanguk Yun<sup>1</sup>,  
5 Sungwoon Lee<sup>2</sup>, William C Sessa<sup>2</sup>, Claudio Franco<sup>3</sup>, Martin A Schwartz<sup>1,4</sup>, Anne  
6 Eichmann<sup>1,5,6\*</sup>

7

8 1 Cardiovascular Research Center, Department of Internal Medicine, Yale University School  
9 of Medicine, New Haven CT, USA.

10 2 Yale University School of Medicine, Department of Pharmacology

11 3 Instituto de Medicina Molecular João Lobo Antunes, Faculdade de Medicina,  
12 Universidade de Lisboa, Lisboa, Portugal.

13 4 Yale University School of Medicine, Departments of Cell Biology and Biomedical  
14 Engineering

15 5 Yale University School of Medicine, Department of Molecular and Cellular Physiology

16 6 Université de Paris, PARCC, INSERM, F-75006 Paris

17

18 \* Author for correspondence ([anne.eichmann@yale.edu](mailto:anne.eichmann@yale.edu))

19

1 **Abstract**

2 **Background:** Activin receptor-like kinase 1 (*ACVRL1*, hereafter *ALK1*) is an endothelial  
3 transmembrane serine threonine kinase receptor for BMP family ligands that plays a  
4 critical role in cardiovascular development and pathology. Loss-of-function mutations in  
5 the *ALK1* gene cause type 2 hereditary hemorrhagic telangiectasia (HHT), a devastating  
6 disorder that leads to arteriovenous malformations (AVMs). Here we show that ALK1  
7 controls endothelial cell polarization against the direction of blood flow and flow-induced  
8 endothelial migration from veins through capillaries into arterioles.

9 **Methods:** Using Cre lines that recombine in different subsets of arterial, capillary-venous  
10 or endothelial tip cells, we showed that capillary-venous *Alk1* deletion was sufficient to  
11 induce AVM formation in the postnatal retina.

12 **Results:** ALK1 deletion impaired capillary-venous endothelial cell polarization against the  
13 direction of blood flow *in vivo* and *in vitro*. Mechanistically, ALK1 deficient cells exhibited  
14 increased integrin signaling interaction with VEGFR2, which enhanced downstream  
15 YAP/TAZ nuclear translocation. Pharmacological inhibition of integrin or YAP/TAZ  
16 signaling rescued flow migration coupling and prevented vascular malformations in *Alk1*  
17 deficient mice.

18 **Conclusions:** Our study reveals ALK1 as an essential driver of flow-induced endothelial  
19 cell migration and identifies loss of flow-migration coupling as a driver of AVM formation  
20 in HHT disease. Integrin-YAP/TAZ signaling blockers are new potential targets to prevent  
21 vascular malformations in HHT patients.

22 **Keywords:** HHT, arteriovenous malformations, mechanotransduction, Integrin, Hippo,  
23 BMP, VEGF

## 1 Introduction

2 Hereditary hemorrhagic telangiectasia (HHT) is an inherited autosomal dominant  
3 vascular disorder that causes arteriovenous malformations (AVMs) in more than 1.4  
4 million people worldwide<sup>1</sup>. More than 80 % of HHT cases are caused by heterozygous  
5 mutations in the endothelial surface receptors Endoglin (*ENG*, mutated in HHT1)  
6 and *ACVRL1* (hereafter referred to as *ALK1*, mutated in HHT2), and mutations in *SMAD4*  
7 cause a combined juvenile polyposis-HHT syndrome that accounts for <5% of HHT  
8 cases<sup>2-5</sup>. *ALK1* and *ENG* are receptors for TGF- $\beta$  superfamily members BMP9 and BMP  
9 10<sup>6, 7</sup>. Ligand binding activates *ALK1/ENG* receptor signaling to cytoplasmic SMAD 1/5/8,  
10 which subsequently complex with *SMAD4* and translocate into the nucleus to regulate  
11 gene expression<sup>8</sup>. Thus, known HHT mutations affect different components of an  
12 endothelial signaling pathway that prevents vessels from forming AVMs. A recent study  
13 has shown that somatic second-hits inactivating the remaining intact *ALK1* or *ENG* allele  
14 occurred in the lesions, supporting that vascular malformations in HHT are caused by a  
15 two-hit mechanism<sup>9</sup>.

16 Whereas the genetics of AVM have been well studied, the underlying cellular and  
17 molecular principles are not fully understood, thus limiting the development of new  
18 treatment options. AVMs are direct connections between arteries and veins that lack an  
19 intermediate capillary bed<sup>2</sup>. AVMs in HHT patients appear most often in the skin, oral  
20 cavity, nasal, and gastrointestinal (GI) tract mucosa, lung, liver, and brain. Small AVMs in  
21 the skin and mucus membranes are called telangiectasias; rupture of these lesions leads  
22 to frequent epistaxis, GI bleeding, and anemia, all of which are major quality of life issues  
23 for HHT patients<sup>10</sup>. Larger AVMs in liver, lung, or brain may additionally cause life-

1 threatening conditions such as high output heart failure and stroke<sup>11</sup>. We and others  
2 previously showed that pan-endothelial knockout of *Alk1* using *Alk1<sup>fl/fl</sup> Cdh5 Cre<sup>ERT2</sup>* in  
3 neonates led to AVMs in retina, brain and internal organs, indicating that endothelial ALK1  
4 is necessary for proper vascular development<sup>12, 13</sup>. However, what types of ECs are  
5 responsible and how AVMs develop remains largely unknown.

6 Previous data from us and others have shown that BMP9/10-ALK1-ENG-SMAD4  
7 signaling is enhanced by flow, and initiates a negative feedback signal that dampens flow-  
8 induced activation of AKT, thereby coordinating proper vascular remodeling<sup>12, 14-17</sup>.  
9 Mechanistically, blocking BMP9-ALK1-ENG signaling promotes endothelial PI3K  
10 (phosphatidylinositol 3-kinase)/AKT activation. ALK1-deficient ECs showed enhanced  
11 phosphorylation of the PI3K target AKT and vascular endothelial growth factor receptor  
12 2 (VEGFR2)<sup>13, 18</sup>. Pharmacological VEGFR2 or PI3K inhibition prevented AVM formation  
13 in *Alk1*-deficient mice and decreased diameter of AVMs in ENG mutants<sup>19</sup>. Moreover, an  
14 increase in PI3K signaling has been recently confirmed in cutaneous telangiectasia  
15 biopsies of patients with HHT2<sup>20, 21</sup>.

16 Here we investigated the origin of AVM-causing cells using novel Cre lines that delete  
17 *Alk1* in subsets of ECs. In doing so, we observed that ECs in remodeling vessels move  
18 against the direction of blood flow, while maintaining vascular integrity. In response to the  
19 physical forces such as wall shear stress exerted by blood, ECs polarize their Golgi  
20 apparatus in front of the nucleus (front-rear polarity) and migrate against the blood flow  
21 from veins towards arteries. We further provide evidence that ALK1 contributes to flow-  
22 migration coupling via VEGFR2-integrin signaling and downstream YAP/TAZ nuclear  
23 translocation. Collectively, the data show that ALK1 controls flow-induced cell migration

- 1 to prevent AVM formation and identify new targets with the potential to prevent vascular
- 2 malformations in HHT patients.
- 3

## 1 **Methods**

### 2 **Mice**

3 All animal experiments were performed under a protocol approved by Institutional Animal  
4 Care Use Committee of Yale University. *Alk1<sup>ff</sup>* mice were kindly provided by Dr. S. Paul  
5 Oh. *Bmx Cre<sup>ERT2</sup>* and *Esm1 Cre<sup>ERT2</sup>* mice were kindly provided by Dr. Ralf Adams and  
6 *Mfsd2a Cre<sup>ERT2</sup>* mice were kindly provided by Dr. Bin Zhou. Seven to eight weeks old  
7 *Alk1<sup>ff</sup>* and *Bmx Cre<sup>ERT2</sup> mTmG*, *Esm1 Cre<sup>ERT2</sup> mTmG* mice or *Mfsd2a Cre<sup>ERT2</sup> mTmG*  
8 mixed genetic background were intercrossed for experiments and *Alk1<sup>ff</sup> Mfsd2a Cre<sup>ERT2</sup>*  
9 (*mTmG*), *Alk1<sup>ff</sup> Esm1 Cre<sup>ERT2</sup> (mTmG)* mice or *Alk1<sup>ff</sup> Bmx Cre<sup>ERT2</sup> (mTmG)* were used.  
10 Gene deletion was induced by intra-gastric injections with 100 µg Tx (Sigma, T5648;  
11 2.5 mg ml<sup>-1</sup>) into pups at P4 or P1-3. Tx-injected *Cre<sup>ERT2</sup>* negative littermates were used  
12 as controls.

### 13 **Latex dye injection**

14 P6 pups were anaesthetized on ice, and abdominal and thoracic cavities were opened.  
15 The right atrium was cut, blood was washed out with 2 ml PBS and 1 ml of latex dye was  
16 slowly and steadily injected into the left ventricle with an insulin syringe. Retinas and GI  
17 tracts were washed in PBS and fixed with 4% paraformaldehyde (PFA) overnight. Brains  
18 and GI tracts were cleared in Benzyl Alcohol : Benzyl Bezonate (1:1) for 2-3 days before  
19 imaging.

### 20 **Reagents and antibodies**

21 For immunostaining: IB4 ([IsolectinB4] #121412, 10 µg/mL; Life Technologies), GFP  
22 Polyclonal Antibody, Alexa Fluor 488 (#A-21311, 1:1000; Invitrogen), GOLPH4

1 (#ab28049, 1:400; abcam), anti-YAP (#14074, 1:300; Cell Signaling), anti-TAZ  
2 (#HPA007415, 1:300 Sigma), mouse anti-ALK1 (#AF770, 1:300; R&D) human anti-  
3 ALK1(#AF370, 1:300; R&D), VE-Cadherin (#555289, 1:200; BD) GM-130 (#610822,  
4 1:500; BD), DAPI (#D1306, 1:1000; Life Technologies), anti-integrin  $\beta$ 1 Alexa Fluor 647  
5 (#303047, 1:500; BioLegend), anti-integrin  $\alpha$ 5 and  $\alpha$ v (From Martin A Schwartz)  
6 For western blotting: anti-ALK1 (7R-49334, 1:1000; Fitzgerald), anti-integrin  $\beta$ 1 (#34971,  
7 Cell Signaling), anti-integrin  $\alpha$ 5 and  $\alpha$ v, anti-VEGFR2 (#9698, Cell Signaling),  $\beta$ -actin  
8 (#A1978 1:3000; Sigma), anti-YAP (#14074, 1:1000; Cell Signaling), anti-TAZ  
9 (#HPA007415, 1:2000 Sigma).  
10 Appropriate secondary antibodies were fluorescently labeled (Alexa Fluor donkey anti-  
11 rabbit, Alexa Fluor donkey anti-goat) or conjugated to horseradish peroxidase (anti-rabbit  
12 and anti-mouse IgG [H+L], 1:8.000; Vector Laboratories).  
13 ATN-161 (#S8454, Selleckchem), cilengitide trifluoroacetate (#S7077, Selleckchem),  
14 verteporfin (#S1786, Selleckchem), wortmannin (#S2758, Selleckchem)

## 15 **Immunostaining**

16 For angiogenesis studies the eyes of P6/P8 pups were prefixed in 4% PFA for 8 min at  
17 room temperature. Retinas were dissected, blocked for 30 min at room temperature in  
18 blocking buffer (1% fetal bovine serum, 3% BSA, 0.5% Triton X-100, 0.01% Na  
19 deoxycholate, 0.02% Sodium Azide in PBS at pH 7.4) and then incubated with specific  
20 antibodies in blocking buffer overnight at 4°C. The next day, retinas were washed and  
21 incubated with IB4 together with the corresponding secondary antibody for overnight at  
22 4°C. The next day, retinas were washed and post-fixed with 0.1% PFA and mounted in

1 fluorescent mounting medium (DAKO, USA). High-resolution pictures were acquired  
2 using ZEISS LSM800 and Leica SP8 confocal microscope with a Leica spectral detection  
3 system (Leica TCS SP8 detector), and the Leica application suite advanced fluorescence  
4 software. Quantification of retinal vasculature was done using ImageJ and then Prism 7  
5 software for statistical analysis.

6 For cell immunostaining, cells were plated on gelatin coated dishes. Growing cells were  
7 fixed for 10 min with 4% paraformaldehyde (PFA) and permeabilized with 0.1% Triton X-  
8 100 for 10 min prior to overnight incubation with primary antibody and then secondary  
9 antibody conjugated with fluorophore.

## 10 **Cell culture and siRNA transfection**

11 Human umbilical vein endothelial cells (HUVECs) were obtained from the Yale University  
12 Vascular Biology and Therapeutics Core Facility and cultured in EGM2-Bullet kit medium  
13 (CC-3156 & CC-4176, Lonza). Depletion of *ALK1*, *SMAD4* or *ENG* was achieved by  
14 transfecting 20 pmol of small interfering RNA (siRNA) against *ALK1* (Qiagen, mixture of  
15 2 siRNAs: S102659972 and S102758392), *SMAD4* (Dharmacon, SMARTpool: ON-  
16 TARGETplus L-003902-00-0005) or *ENG* (Dharmacon, ON-TARGETplus LQ-011026-  
17 00-0005) using Lipofectamine RNAiMax (Invitrogen). Transfection efficiency was  
18 assessed by western blotting and quantitative PCR (qPCR). Experiments were performed  
19 60 hours posttransfection and results were compared with siRNA CTRL (ON-  
20 TARGETplus Non-Targeting Pool D-001810-10-05).

## 21 **Shear stress experiments.**



1 HUVECs were re-plated on glass slides coated with the indicated proteins for 6 hours and  
2 wound scratch was carried out on the slides before application of flow. The slides were  
3 loaded into parallel plate flow chambers. Laminar shear at 15 dynes/cm<sup>2</sup> was used to  
4 mimic high flow in retinal veins.

5 For real-time imaging, PH-AKT-mClover3 was modified from PH-AKT-GFP (addgene  
6 #51465). Plasma membrane targeting sequence of LCK tagged with mRuby3 (LCK-  
7 mRuby3, modified from addgene #98822) was co-expressed in the same vector by IRES  
8 sequence as a plasma membrane marker. HUVECs were transfected with siRNAs  
9 followed by lentiviral transduction coding PH-AKT-mClover3 and LCK-mRuby3. The  
10 infected cells were mixed with uninfected cells in 1:2 ratio, then seeded on microfluidic  
11 chamber (IBIDI u-slide 0.4 luer, 1x10<sup>5</sup> total cell/slide) and cultured additional 24-48 hours  
12 more for imaging. Imaging was performed on an Eclipse Ti microscope equipped with an  
13 Ultraview Vox spinning disk confocal imaging system, with 20X objective (Plan Apo,  
14 Nikon). Each pixel intensity was plotted as y with corresponding distance from upstream  
15 of the cell as x, which was normalized to have length 1 to the direction of flow (0 to 1).  
16 Then slope of the plot at each time frame was measured as a representative value of cell  
17 polarity.

## 18 **Western blotting**

19 Cells were lysed with Laemmli buffer including phosphatase and protease inhibitors  
20 (Thermo Scientific, 78420, 1862209). 20 µg of proteins were separated on 4% to 15%  
21 Criterion precast gels (567–1084, Biorad) and transferred on 0.23 µm nitrocellulose  
22 membranes (Biorad). Western blots were developed with chemiluminescence  
23 horseradish peroxidase substrate (Millipore, WBKLS0500) on a Luminescent image

1 Analyzer, ImageQuant LAS 4000 mini (GE Healthcare). Bands were quantified using  
2 ImageJ.

### 3 **Immunoprecipitation**

4 Cell lysates were prepared in 50 mM Tris-HCl at pH 7.4, 50 mM NaCl, 0.5% Triton X-100,  
5 phosphatase and protease inhibitors, centrifuged at  $16,000 \times g$  for 20 min. Protein  
6 concentration was quantified using Bradford assay (Pierce). In total, 500  $\mu\text{g}$  of protein  
7 from cell lysate were incubated overnight at 4 °C with 10  $\mu\text{g}/\text{ml}$  of anti-VEGFR2, and finally  
8 incubated with protein A/G magnetic beads (88802, Thermo Scientific) for 2 h at 4 °C. The  
9 immunocomplexes were washed three times in lysis buffer and resuspended in 1X  
10 Laemmli's sample buffer. For western-blot analysis, 50  $\mu\text{g}$  of protein was loaded for each  
11 condition.

### 12 **Polarity index calculation**

13 Briefly, after segmenting each channel corresponding to the Golgi and nuclear staining,  
14 the centroid of each organelle was determined and a vector connecting the center of the  
15 nucleus to the center of its corresponding Golgi apparatus was drawn. The Golgi-nucleus  
16 assignment was done automatically minimizing the distance between all the possible  
17 couples. The polarity of each cell was defined as the angle between the vector and the  
18 scratch line. An angular histogram showing the angle distribution was then generated.  
19 Circular statistic was performed using the Circular Statistic Toolbox. To test for circular  
20 uniformity, we applied the polarity index (PI), calculated as the length of mean resultant  
21 vector for a given angular distribution<sup>22</sup>.

1

$$\text{Polarity Index} = \sqrt{\left(\frac{1}{N} \sum_1^N \cos \alpha\right)^2 + \left(\frac{1}{N} \sum_1^N \sin \alpha\right)^2}$$

#### 4 **Statistical Analysis**

5 All data are shown as mean standard error of the mean. Tow-tailed unpaired t-test was  
6 used to compare 2 groups. Oneway ANOVA was used to compare more than 2 groups  
7 followed by appropriate post hoc multiple comparison procedure (Holm-Sidak multiple  
8 comparisons test). To construct the survival curves we have used the Kaplan–Meier  
9 method. P value <0.05 was considered to be statistically significant. Statistical analyses  
10 were performed for all quantitative data using Prism 6.0 (Graph Pad).

11

## 1 Results

### 2 Endothelial lineage tracing reveals flow migration coupling in retinal vessels

3 To track the dynamics of endothelial flow migration coupling in the mouse retina, we used  
4 three *Cre<sup>ERT2</sup>* lines that recombine in subsets of ECs. These include Major Facilitator  
5 Superfamily Domain Containing 2a (*Mfsd2a*), which recombines venous and capillary  
6 ECs but not arteries or tip cells in the brain vasculature<sup>23-25</sup>; Endothelial cell-specific  
7 molecule 1 (*Esm1*), which recombines tip cells and their progeny<sup>26, 27</sup>; and the artery-  
8 specific Bone marrow x (*Bmx*)<sup>28</sup> line. We intercrossed these lines with *mTmG* reporter  
9 mice<sup>29</sup> to lineage-trace GFP positive *Mfsd2a*, *Esm1* and *Bmx* expressing ECs. Tamoxifen  
10 (Tx) was injected 12 h, 24 h and 48 h prior to sacrifice at P6 (Figure 1 A-I). At 12 h post  
11 injection, *Mfsd2a* positive cells were absent from the tip cell position, but labeled veins  
12 and capillaries in the vascular plexus, as well as the distal pole of arterioles (Figure 1A).  
13 *Esm1*-positive cells were restricted to the tip position, while *Bmx Cre<sup>ERT2</sup>* positive cells  
14 were located in the proximal part of retinal arterioles close to the optic nerve (Figure 1B-  
15 C). Hence the three *Cre* lines labeled distinct and non-overlapping endothelial cell  
16 populations at this time point.

17 24 h and 48 h after injection, *Mfsd2a*-positive cells were still excluded from the tip position,  
18 but progressively colonized the arteries from the distal to the proximal part (Figure 1D,G).  
19 *Esm1*-positive cells were seen at the tip position and moving towards the distal parts of  
20 the arterioles at 24h and 48 h after injection (Figure 1E,H), while *Bmx*-positive cells  
21 remained confined to the proximal arterioles (Figure 1F,I). Very few *Mfsd2a*-GFP positive  
22 cells were detected in arteries 4 h and 6 h post Tx injection (Supp. Figure 1 A, Figure 1J),  
23 while 400 h after P4 Tx injection, ie at P21, most of the retinal endothelium was GFP

1 positive (Figure 1K). By contrast, a single Tx injection at P20 labeled venous and capillary  
2 endothelium, but not arteries at P21 (Figure 1 L), demonstrating that ECs of venous and  
3 capillary origin migrate against the direction of flow into neighboring arteries during  
4 vascular remodeling.

5 To quantify displacement of *Mfsd2a*-GFP positive cells, we measured the relative length  
6 of GFP positive area in retinal arteries, veins and capillaries at different time points (Figure  
7 1M). After 12 h, about 90 % of venous and capillary vessel area was occupied by GFP-  
8 positive cells, while only 50% of the distal arterial vessel area was occupied by GFP-  
9 positive cells and this gradually increased over time until 48 h (Figure 1M), demonstrating  
10 quantifiable displacement of capillary and venous ECs towards arteries over time.

### 11 ***Alk1* deletion in capillary and venous ECs causes AVMs**

12 To determine the origin of AVM forming cells in *Alk1* mutants, we next intercrossed  
13 *Mfsd2a*, *Esm1* and *Bmx Cre<sup>ERT2</sup>* mice with *Alk1<sup>ff</sup> mTmG* reporter mice. Tx was injected  
14 at P4 and mice were analyzed at P6 (Figure 2 A). Efficient *Alk1* deletion was verified in  
15 all three lines using immunostaining (Supp. Figure 2). Interestingly, venous and capillary  
16 endothelial *Alk1* deletion using the *Mfsd2a Cre<sup>ERT2</sup>* driver line led to numerous AVMs in  
17 the retina (Figure 2 B and E). By contrast, neither *Alk1<sup>ff</sup> Esm1 Cre<sup>ERT2</sup>* nor *Alk1<sup>ff</sup> Bmx*  
18 *Cre<sup>ERT2</sup>* mutants displayed any retinal AVMs (Figure 2 C-D and F-G). We analyzed the  
19 presence of retinal and brain AVMs by injection of latex dye into the left ventricle of P6  
20 *Alk1<sup>ff</sup> Mfsd2a Cre<sup>ERT2</sup>* and control littermates (Figure 2 H-K). The latex dye does not cross  
21 the capillary beds and was retained within the arterial branches in *Alk1<sup>ff</sup>* brain and retina  
22 (Figure 2 H-I). In the *Alk1<sup>ff</sup> Mfsd2a Cre<sup>ERT2</sup>* mutants, the latex penetrated both the venous  
23 as well as the arterial branches via AVMs in the retina and brain (Figure 2 J-K). To see

1 whether *Alk1<sup>ff</sup> Esm1 Cre<sup>ERT2</sup>* and *Alk1<sup>ff</sup> Bmx Cre<sup>ERT2</sup>* could develop AVMs by longer-term  
2 exposure of Tx, Tx was injected at P1 and mice were analyzed at P6 (Figure 2 L). Neither  
3 *Alk1<sup>ff</sup> Esm1 Cre<sup>ERT2</sup>* nor *Alk1<sup>ff</sup> Bmx Cre<sup>ERT2</sup>* mutants exhibited any AVMs (Figure 2 M-N).  
4 Next, we examined the survival rate of these three mouse lines. *Alk1<sup>ff</sup> Mfsd2a Cre<sup>ERT2</sup>*  
5 mice died 5 to 6 days after gene deletion, most likely from ruptured brain AVMs, while  
6 *Alk1<sup>ff</sup> Bmx Cre<sup>ERT2</sup>* mice lived at least 50 days after gene deletion (Figure 3 A).  
7 Interestingly, the *Alk1<sup>ff</sup> Esm1 Cre<sup>ERT2</sup>* mutants died 10-11 days after Tx injection (Figure  
8 3 A), suggesting they might develop AVMs in other tissues. Autopsy revealed massive  
9 intestinal hemorrhages in *Alk1<sup>ff</sup> Esm1 Cre<sup>ERT2</sup>* mice as a likely cause of death (Figure 3  
10 B). To define the Esm1 expression in intestines, Tx was injected at P4 and *Esm1 Cre<sup>ERT2</sup>*  
11 *mTmG* mice were analyzed at P14. GFP-positive cells were found in scattered capillaries  
12 of the mesenteries, the intestinal wall and the intestinal villi (Figure 3 C-D). We performed  
13 immunostaining of VE-Cadherin (VE-Cad) and GFP in P14 *Alk1<sup>ff</sup>* and *Alk1<sup>ff</sup> Esm1 Cre<sup>ERT2</sup>*  
14 *mTmG* mice (Figure 3 E-F). *Alk1<sup>ff</sup> Esm1 Cre<sup>ERT2</sup> mTmG* developed GFP positive vascular  
15 malformations in capillaries of the intestinal villi (Figure 3 F). Injection of latex dye  
16 confirmed the presence of AVMs in the intestinal villi and in the mesenteries (Figure 3 G-  
17 J). To identify the presence of AVMs in other vascular beds, immunostaining and latex  
18 red dye injections were performed in P12 and P14 *Alk1<sup>ff</sup>* and *Alk1<sup>ff</sup> Esm1 Cre<sup>ERT2</sup> mTmG*  
19 mice (Figure 3 K-P). *Alk1<sup>ff</sup> Esm1 Cre<sup>ERT2</sup> mTmG* developed GFP positive vascular  
20 malformations in retinal capillaries, and migration of Alk1 mutant tip cell progeny into the  
21 arteries was perturbed (Figure 3 K-L). Latex injection confirmed abnormal patterning of  
22 distal retinal arteries derived from the ESM1+ tip cells (Figure 3 M-N). The latex also  
23 revealed vascular malformations in the pial arteries of the brain in *Alk1<sup>ff</sup> Esm1 Cre<sup>ERT2</sup>*

1 mice (Figure 3 O-P), but full-blown AVMs were not observed in retina or brain. These data  
2 indicate that loss of ALK1 signaling in ESM1 expressing capillaries leads to intestinal  
3 vascular malformations.

#### 4 **Loss of ALK1 affects cell polarity and flow-migration coupling.**

5 To test if flow-mediated EC polarization was altered in the absence of ALK1, we dissected  
6 retinas at P6 48 h after Tx injection and immunolabeled with IB4 to detect ECs, DAPI to  
7 label nuclei, the Golgi marker GOLPH4 and ALK1 (Figure 4 A-F). To analyze the  
8 orientation of the Golgi toward the flow direction in the retinal vessels, we measured the  
9 angles between the EC nuclei and the Golgi as well as the predicted blood flow vectors  
10 (Figure 4 C'-F', Figure 4 G). In *Alk1<sup>ff</sup>* retinas, ALK1 expressing arterial, venous and  
11 capillary ECs polarized against the direction of blood flow (Figure 4 A, C, C' and H). In  
12 contrast, ECs from *Alk1<sup>ff</sup> Mfsd2a Cre<sup>ERT2</sup>* retinas showed random Golgi distribution in  
13 veins, capillaries and AVMs (Figure 4 B, E, E', F, F' and H). Proximal arteries in *Alk1<sup>ff</sup>*  
14 *Mfsd2a Cre<sup>ERT2</sup>* retinas that maintained ALK1 expression were polarized normally against  
15 the flow (Figure 4B, D, D' and H) Quantification of polarization using a polarity index (PI),  
16 which ranges from 1 (strongly polarized) to 0 (random distribution) confirmed that *Alk1<sup>ff</sup>*  
17 retinal ECs were strongly polarized against the direction of blood flow, while *Alk1<sup>ff</sup> Mfsd2a*  
18 *Cre<sup>ERT2</sup>* mutant ECs in capillaries, veins and AVMs displayed poor polarization against  
19 the direction of blood flow (Figure 4 I). To determine whether these polarity defects  
20 preceded AVM development, Tx was injected at P4 and mice were analyzed after 24 h  
21 (P5) or 36 h (P5.5). Interestingly, AVMs started to appear at 24 h and were more  
22 pronounced at 36 h (Figure 4 J-K). Analysis of cell polarity in P5 *Alk1<sup>ff</sup> Mfsd2a Cre<sup>ERT2</sup>*  
23 mutants and controls showed that venous and capillary ECs from *Alk1<sup>ff</sup> Mfsd2a Cre<sup>ERT2</sup>*

1 retinas displayed poorly polarized Golgi distribution (Figure 4 L, M), indicating that lack of  
2 flow-induced polarity preceded AVM formation and could be causally related to AVM  
3 development.

4 To explore whether laminar flow affected the polarization of *Alk1* mutant cells *in vitro*, we  
5 performed scratch wound assays with human umbilical vein endothelial cells (HUVECs)  
6 that were cultured in static conditions or subjected to laminar shear stress (15 dynes/cm<sup>2</sup>)  
7 and stained with a Golgi marker to determine cell polarity angles<sup>22</sup>. In static conditions,  
8 control siRNA transfected HUVECs were polarized towards the scratch areas in both the  
9 left and the right side of the wound (Fig.5A,C). Under laminar shear, the cells on the left  
10 side upstream of the scratch repolarize in the opposite direction to align against the flow  
11 (Fig.5E,G). By contrast, *ALK1* deficient HUVECs showed random polarization in static  
12 conditions (Fig.5B,D). Most strikingly, they were unable to polarize against the direction  
13 of flow in the upstream scratch areas, and even the downstream polarization against the  
14 flow was impaired (Figure 5 F,H). Polarity index calculation showed that flow significantly  
15 enhanced polarization of control siRNA transfected cells, and that *ALK1* deletion  
16 prevented flow induced polarization (Figure 5 I).

17 Flow induces localization of phosphorylated AKT to the upstream edge of ECs<sup>30</sup>.  
18 Pleckstrin homology domain of AKT fused to GFP (PH-AKT-GFP) is a well-established  
19 biosensor of PI3K local activity which shows plasma membrane localized PH-AKT-GFP  
20 upon shear stress<sup>31</sup>. To examine whether *ALK1* affected flow-induced PI3K localization,  
21 we performed live cell imaging. PH-AKT-mClover3 together with plasma membrane  
22 marker (LCK-mRuby3) were co-expressed as a biosensor and an internal control  
23 respectively. Control siRNA transfected HUVECs showed polarized activation of PI3K on



1 their upstream edge within 5 minutes after flow, consistent with upstream Golgi  
2 polarization. By contrast, *ALK1* knockdown significantly diminished this effect (Figure 5 J  
3 and K, Supp. Figure 3 movies). This result indicated that ALK1 is required for flow-  
4 induced PI3K-AKT polarization.

### 5 **Blockade of integrin prevents AVM formation.**

6 Golgi orientation into scratch wounds and under flow is driven by integrin binding to ECM  
7 proteins and signaling to CDC42<sup>32, 33</sup>. Additionally, integrin activation and signaling is  
8 modulated by VEGFR2-PI3K signaling, which is altered following ALK1 deletion<sup>12, 13, 18 34</sup>.  
9 VEGFR2 interacts with integrins  $\alpha_v\beta_3$  and  $\alpha_5\beta_1$  during vascularization<sup>35-37</sup>, prompting us  
10 to test if VEGFR2-integrin signaling was enhanced in *ALK1* deficient ECs. Interestingly,  
11 immunolabeling with antibodies recognizing integrin  $\beta_1$  (ITGB1),  $\alpha_5$  (ITGA5) and  $\alpha_v$   
12 (ITGAV) showed increased ITGB1, ITGA5 and ITGAV expression in the AVM areas of P8  
13 *Alk1<sup>ff</sup> Mfsd2a Cre<sup>ERT2</sup>* retinas when compared to wildtype controls (Figure 6 A-C and  
14 Supp. Figure 4 A-C). We next tested if the interaction of VEGFR2 and integrin was  
15 affected in *ALK1* deleted cells. While total levels of ITGB1, ITGA5 and ITGAV were  
16 moderately increased in *ALK1* knockdown cells, their co-immunoprecipitation with  
17 VEGFR2 was enhanced to a greater degree (Figure 6 D,E). These results suggested that  
18 targeting integrins signaling with inhibitors could rescue AVM formation. To test this idea,  
19 we administered Cilengitide, a small molecule inhibitor for integrin  $\alpha_v\beta_3$  and  $\alpha_v\beta_5$ , or  
20 ATN161, a peptide inhibitor for integrin  $\alpha_5\beta_1$ . *Alk1* deletion was induced by Tx injection at  
21 P4, inhibitors were given i.p at 5 mg/kg at P4 and P5, and mice were analyzed at P6  
22 (Figure 6 F). Both Cilengitide and ATN161 decreased AVM formation in *Alk1<sup>ff</sup> Mfsd2a*  
23 *Cre<sup>ERT2</sup>* or *Alk1<sup>ff</sup> Cdh5 Cre<sup>ERT2</sup>* mice (Figure 6 G-N). Immunostaining of Golgi markers

1 showed that integrin inhibitors rescued polarization of *Alk1* mutant cells against the  
2 direction of blood flow (Figure 6 O-S).

### 3 **ALK1 controls integrin mediated Hippo pathway signaling.**

4 Previous data reported an interaction between BMP9/ALK1 signaling and the YAP/TAZ  
5 pathway, and both of these pathways are regulated by blood flow *in vivo*<sup>38, 39</sup>. Moreover,  
6 integrins are potent regulators of YAP/TAZ activation in many systems including ECs<sup>40-</sup>  
7 <sup>42</sup>. Activation of YAP/TAZ results in both protein stabilization and nuclear translocation,  
8 with induction of target gene expression. To test whether laminar shear and ALK1  
9 affected integrin and YAP/TAZ protein expression, HUVECs were transfected with control  
10 or *ALK1* siRNA and cultured in static conditions or under laminar shear stress (15  
11 dynes/cm<sup>2</sup>) for 18 h. Protein extracts from these cells were analyzed by Western blot with  
12 antibodies against integrins, YAP or TAZ and expression levels were compared to  $\beta$ -actin.  
13 Interestingly, ITGB1, ITGA5 and ITGAV as well as YAP and TAZ were all significantly  
14 increased in *ALK1* deleted ECs when compared to control siRNA transfected cells, and  
15 their expression was further increased in laminar shear stress conditions (Figure 7 A- B).  
16 YAP and TAZ protein expression was also greatly increased and appeared more nuclear  
17 in *Alk1<sup>ff</sup> Mfsd2a Cre<sup>ERT2</sup>* retina AVMs when compared to *Alk1<sup>ff</sup>* control ECs (Figure 7 C-  
18 F). Immunostaining of *ALK1* deficient HUVECs with YAP and TAZ antibodies confirmed  
19 an increase of YAP/TAZ expression in *ALK1* siRNA transfected HUVECs, and moreover  
20 revealed that YAP and TAZ located both in the cytosol and the nucleus *ALK1* deficient  
21 cells, while they were located in the cytosol of control siRNA treated ECs (Figure 7 G-H).  
22 To test whether other HHT pathway components *ENG* and *SMAD4* also affected  
23 YAP/TAZ activity, we deleted *ALK1*, *SMAD4*, and *ENG* in HUVECs and immunostained

1 for YAP and TAZ (Figure 8 A). We found that YAP and TAZ showed translocation to the  
2 nucleus in *ALK1*, *SMAD4*, and *ENG* deleted ECs (Figure 8 A). Furthermore, we found  
3 that the YAP/TAZ inhibitor Verteporfin (VP) blocked YAP/TAZ activity and translocation  
4 to the nucleus in *ALK1*, *SMAD4*, and *ENG* depleted HUVECs (Figure 8 A). To examine  
5 whether the inhibition of YAP/TAZ could improve AVMs *in vivo*, we first administered VP  
6 (50 mg/kg, i.p.) into P4 and P5 *Alk1<sup>ff</sup>* control mice (Figure 8 B). VP injected control retina  
7 developed blunted endothelial tip cells at the angiogenic front (Figure 8 C), as reported in  
8 genetically YAP/TAZ deficient endothelial mouse retinas<sup>38, 43, 44</sup> indicating that the  
9 pharmacological inhibition was effective. Next we injected VP into *Alk1<sup>ff</sup> Cdh5 Cre<sup>ERT2</sup>* or  
10 *Alk1<sup>ff</sup> Mfsd2a Cre<sup>ERT2</sup>* retinas, which led to a significant reduction of AVM formation and  
11 hemorrhage when compared to DMSO vehicle treated mutant retinas (Figure 8 C- E). VP  
12 treatment also rescued the polarization against the direction of blood flow (Figure 8 F-G).  
13 These results demonstrated that ALK1 regulates Hippo pathway activation, and that VP-  
14 mediated inhibition of YAP/TAZ nuclear translocation improved flow migration coupling  
15 and prevented AVMs in *Alk1* mutant ECs.

## 16 **integrin and PI3K function upstream of YAP/TAZ**

17 To elucidate whether ALK1 modulation of the Hippo pathway was integrin and PI3K  
18 dependent, we examined YAP/TAZ activity and translocation to the nucleus upon integrin  
19 inhibitor or PI3K inhibitor treatment. Intriguingly, YAP/TAZ activity and nuclear  
20 translocation was significantly reduced in *ALK1* deleted HUVECs treated with integrin  
21 inhibitors Cilengitide or ATN161 (Figure 9 A and B), and in *ALK1* deleted cells treated  
22 with the PI3K inhibitor wortmannin (Supp. Figure 5 A). Next, we injected Tx into P4 *Alk1<sup>ff</sup>*  
23 *Mfsd2a Cre<sup>ERT2</sup>* mice and administered Cilengitide and ATN161 at P4 and P5 to examine

- 1 the YAP/TAZ activity and nuclear translocation. Interestingly, YAP/TAZ nuclear
- 2 translocation was blocked in integrin inhibitor injected *Alk1<sup>ff</sup> Mfsd2a Cre<sup>ERT2</sup>* retinas when
- 3 compared to *Alk1<sup>ff</sup>* control retinas (Figure 9 C).

## 1 Discussion

2 This study extends our previous knowledge by identifying the origin of AVM  
3 forming cells from capillaries and veins and the role of integrin and Hippo pathway  
4 signaling in HHT. The data are consistent with a model whereby the presence of ALK1  
5 suppressed integrin-VEGFR2 signaling interactions, which limited downstream PI3K  
6 activation and signaling to YAP/TAZ, as indicated by changes in protein levels and  
7 nuclear translocation. In the absence of ALK1, enhanced VEGFR2-integrin-PI3K  
8 signaling stabilized YAP/TAZ and promoted nuclear translocation. Pharmacological  
9 inhibition of integrin or YAP/TAZ signaling prevented vascular malformations in *Alk1*  
10 deficient mice (Figure 9 D).

11 In retinal development, *Mfsd2a*-positive capillary-venous as well as *Esm1*-positive  
12 tip cells migrated against the blood flow direction towards retinal arteries. This is  
13 consistent with work published by others and highlights endothelial flow-migration  
14 coupling as a critical process driving vascular remodeling<sup>22, 45, 46</sup>. The current concept  
15 suggests that, in response to blood flow, ECs migrate from low flow segments (veins and  
16 capillaries) towards high flow segments (arteries)<sup>45</sup>. In this study, we tested the  
17 hypothesis that disruption of flow-migration coupling and resulting accumulation of ECs  
18 in capillaries could cause capillary enlargement and thereby precipitate AVM formation.  
19 Consistent with this model, deletion of *Alk1* in capillaries and veins using *Mfsd2a Cre<sup>ERT2</sup>*  
20 led to disruption of Golgi polarization against the flow direction and caused retinal and  
21 cerebral AVMs, while arterial-specific *Alk1<sup>fl/fl</sup> Bmx Cre<sup>ERT2</sup>* mice developed no AVMs.  
22 *Mfsd2a* is a brain-specific endothelial gene<sup>25, 47</sup>, hence our analysis of these mice was  
23 restricted to the brain and retina. In addition, a recent study showed that capillary/venous-

1 specific deletion of the ALK1 co-receptor ENG using *ENG<sup>f/f</sup> Apj-Cre<sup>ERT2</sup>* mice induced  
2 retinal AVMs<sup>48</sup>, indicating that the Alk1-ENG complex is required in capillaries and veins  
3 to prevent AVM formation, and that defective flow-migration coupling is a hallmark of HHT.  
4 Whether venous or capillary ECs, or both, are involved in the vascular malformations,  
5 needs to be further investigated and will require generation of capillary or vein-specific  
6 *Cre* driver lines.

7         Interestingly, deletion of *Alk1* in *Esm1*-positive tip cells also led to defective flow-  
8 migration coupling and accumulation of the mutant cells in the vascular plexus ahead of  
9 the arteries, while control cells colonized the arterial tree. This underscores an important  
10 role of *Alk1* in flow-migration coupling of retinal tip cells, but produced only mild retinal  
11 and brain vascular malformations when compared to pan-endothelial *Alk1<sup>f/f</sup> Cdh5 Cre<sup>ERT2</sup>*  
12 and *Alk1<sup>f/f</sup> Mfsd2a Cre<sup>ERT2</sup>* mice. One possible reason for the discrepant phenotypes are  
13 different flow environments: *Esm1*-positive tip cells migrate in a low-flow environment,  
14 whereas AVMs develop in high-flow regions of the retina, close to the optic nerve, and  
15 we and others have previously reported that blood flow potentiates ALK1-ENG-mediated  
16 shear stress sensing<sup>15, 27</sup>.

17         Quite strikingly, despite the lack of AVMs in retina and brain, the *Alk1<sup>f/f</sup> Esm1*  
18 *Cre<sup>ERT2</sup>* mice developed intestinal AVMs and succumbed to intestinal hemorrhage.  
19 Analysis of *Esm1*-driven GFP labeling revealed expression in capillary endothelium of the  
20 mesenteries, the gut wall and the intestinal villi, and GFP positive cells formed AVMs in  
21 those regions in *Alk1<sup>f/f</sup> Esm1 Cre<sup>ERT2</sup>* mutant mice. Hence, capillary function of *Alk1* was  
22 required to prevent intestinal AVM formation. Further analysis is required to assess  
23 whether flow-migration coupling also underlies intestinal vascular remodeling, but such

1 studies will require endothelial specific fluorescent Golgi reporter mice to determine  
2 endothelial cell polarity.

3 Our *in vitro* data revealed that loss of ALK1 displayed disrupted endothelial Golgi  
4 orientation and polarization against the blood flow direction. Blocking blood flow in  
5 zebrafish *alk1* mutants prevented AVM formation, directly demonstrating that blood flow  
6 induces AVM formation in the absence of ALK1<sup>49</sup>. We and others have previously  
7 reported that BMP9/10-Alk1 signaling mechanistically links flow sensing and VEGFR2-  
8 PI3K/AKT pathway activation<sup>12-15, 17, 20, 50</sup>. Alk1 signaling counteracted both flow and  
9 growth factor-induced AKT activation, and the absence of Alk1 overactivated PI3K/AKT  
10 signaling in AVMs<sup>51-53</sup>. We extend these findings here by demonstrating that ALK1 is  
11 required for flow-induced PI3K-AKT polarization against the direction of blood flow.  
12 Besides enhanced VEGFR2/PI3K signaling, another study showed that loss of SMAD4  
13 increased Angiopoietin2 and decreased TIE2 receptor expression<sup>54</sup>. Blocking  
14 Angiopoietin2 prevented AVM formation and normalized vessel diameters in endothelial  
15 *Smad4* deficient mice<sup>54</sup>. But TIE2 accumulated within the AVMs<sup>54</sup>, suggesting that  
16 increased TIE2 signaling could contribute to enhanced PI3K signaling in AVMs.

17 As new mechanistic findings, we report that integrins and YAP/TAZ signaling are  
18 involved in ALK1 signaling and AVM formation. Integrins are heterodimeric  
19 transmembrane receptors that are activated by flow and then bind to specific ECM  
20 proteins. RGD peptides or neutralizing antibodies against integrin  $\alpha_5\beta_1$  prevented laminar  
21 shear stress-induced increase in EC adhesion<sup>55-57</sup>. This correlates with our data that *Alk1*  
22 mutant showed increased integrins in AVM regions and Cilengitide and ATN161 improved  
23 AVMs in *Alk1* mutant mice. Cilengitide is a selective  $\alpha_v\beta_3$  and  $\alpha_v\beta_5$  integrin inhibitor. Phase

1 3 trials using Cilengitide for glioblastoma patients have failed to improve patient survival,  
2 however they were well tolerated<sup>58</sup>. We reasoned that integrin antagonists could be a  
3 safe treatment to improve the AVMs in *Alk1* mutants, thereby identifying Integrin  
4 antagonists as viable candidates for therapy in HHT patients.

5 Hippo-YAP/TAZ signaling regulates organ size, tissue regeneration and self-  
6 renewal as well as vascular development<sup>38, 39, 59-62</sup>. Endothelial YAP/TAZ are important  
7 for the activation of CDC42 and for junction integrity and stabilization to control cell  
8 polarity<sup>63</sup>. In zebrafish, YAP translocates to the nucleus in response to blood flow and  
9 promotes cell migration and proliferation<sup>39</sup>, suggesting that nuclear YAP/TAZ  
10 accumulation in ALK1 deficient ECs could contribute to enhanced proliferation. One of  
11 the endothelial YAP/TAZ targets CCN1 increases activation of the VEGFR2 and PI3K  
12 signaling pathways by binding with integrin  $\alpha_v\beta_3$  and VEGFR2, creating a positive  
13 feedback loop that maintains endothelial polarity<sup>64</sup>. Moreover, YAP/TAZ can integrate  
14 mechanical signals with BMP signaling to maintain junctional integrity<sup>38</sup>. *Alk1* appears to  
15 mainly affect nuclear Yap/TAZ function. We found that loss of ALK1 increased protein  
16 levels and co-immunoprecipitation of integrins and VEGFR2 in a flow-dependent manner,  
17 leading to overactivated and mislocalized PI3K signaling and increased YAP/TAZ nuclear  
18 localization. Nuclear Yap/TAZ could complex with TEAD and transcriptionally regulate  
19 YAP/TAZ target gene expression including integrin ligands such as CYR61 and CTGF  
20 thereby creating a pathological positive feedback loop that continues to increase  
21 integrins<sup>35, 68</sup>. In addition, increased VEGFR2-PI3K signaling promotes activation of  
22 integrins<sup>35, 64</sup>, and integrins in focal adhesions activate YAP/TAZ through Rho GTPase  
23 (CDC42) activation<sup>32</sup>. Thus, ALK1 is an important regulator of VEGFR2-PI3K-integrin-



1 YAP/TAZ positive feedback loop. While mechanistic details of pathway interaction remain  
2 to be determined, our data identify the YAP/TAZ inhibitor Verteporfin, which inhibits  
3 YAP/TAZ translocation to the nucleus to block YAP-TEAD association<sup>65, 66</sup>, as a novel  
4 inhibitor therapy for AVMs. Verteporfin photodynamic therapy is approved for the  
5 treatment of choroidal neovascularization due to age-related macular degeneration<sup>67</sup> and  
6 both integrin inhibitors and verteporfin might be novel therapeutic options for HHT patients.

7

## 1 **Acknowledgements**

2 We thank ATTRACT members Paul Oh, Lena Claesson-Welsh, Miguel Bernabeu and  
3 Holger Gerhardt for critical comments on the manuscript, Profs Bin Zhou (Shanghai  
4 Institute for Biological Sciences) and Ralf Adams (Max-Planck Institute, Munster,  
5 Germany) for mouse lines, and Dr. Jihoon Park for Python scripts to measure polarity and  
6 index.

7

## 1 **Sources of Funding**

- 2 This work was supported by grants from the Leducq Foundation (TNE ATTRACT, A.E,
- 3 C.F) and NIH (P30 EY026878 to A.E and R01 HL135582 to M.A.S).

1 **Disclosures**

2 None.

1 **Affiliations**

2 Cardiovascular Research Center, Department of Internal Medicine, Yale University School  
3 of Medicine, New Haven CT, USA. (H.P, J.F, M.P, M.C, S.Y, M.A.S, A.E), Yale University  
4 School of Medicine, Department of Pharmacology (L.S, W.C.S), Instituto de Medicina  
5 Molecular João Lobo Antunes, Faculdade de Medicina, Universidade de Lisboa, Lisboa,  
6 Portugal (C.F), Yale University School of Medicine, Departments of Cell Biology and  
7 Biomedical Engineering (M.A.S), Yale University School of Medicine, Department of  
8 Molecular and Cellular Physiology (A.E), Université de Paris, PARCC, INSERM, F-75006  
9 Paris (A.E)

10

## 1   **References**

- 2    1.     Shovlin CL. Hereditary haemorrhagic telangiectasia: Pathophysiology, diagnosis  
3    and treatment. *Blood Reviews*. 2010;24:203-219.
- 4    2.     McAllister KA, Grogg KM, Johnson DW, Gallione CJ, Baldwin MA, Jackson CE,  
5    Helmbold EA, Markel DS, McKinnon WC, Murrel J, McCormick MK, Pericak-Vance MA,  
6    Heutink P, Oostra BA, Haitjema T, Westerman CJJ, Porteous ME, Guttmacher AE,  
7    Letarte M and Marchuk DA. Endoglin, a TGF- $\beta$  binding protein of endothelial cells, is the  
8    gene for hereditary haemorrhagic telangiectasia type 1. *Nature Genetics*. 1994;8:345-351.
- 9    3.     Johnson DW, Berg JN, Baldwin MA, Gallione CJ, Marondel I, Yoon SJ, Stenzel  
10   TT, Speer M, Pericak-Vance MA, Diamond A, Guttmacher AE, Jackson CE, Attisano L,  
11   Kucherlapati R, Porteous MEM and Marchuk DA. Mutations in the activin receptor–like  
12   kinase 1 gene in hereditary haemorrhagic telangiectasia type 2. *Nature Genetics*.  
13   1996;13:189-195.
- 14   4.     Gallione CJ, Repetto GM, Legius E, Rustgi AK, Schelley SL, Tejpar S, Mitchell G,  
15   Drouin E, Westermann CJ and Marchuk DA. A combined syndrome of juvenile polyposis  
16   and hereditary haemorrhagic telangiectasia associated with mutations in MADH4  
17   (SMAD4). *Lancet*. 2004;363:852-9.
- 18   5.     Gallione CJ, Klaus DJ, Yeh EY, Stenzel TT, Xue Y, Anthony KB, McAllister KA,  
19   Baldwin MA, Berg JN, Lux A, Smith JD, Vary CPH, Craigen WJ, Westermann CJJ,  
20   Warner ML, Miller YE, Jackson CE, Guttmacher AE and Marchuk DA. Mutation and  
21   expression analysis of the endoglin gene in Hereditary Hemorrhagic Telangiectasia  
22   reveals null alleles. *Human Mutation*. 1998;11:286-294.

- 1 6. Roman BL and Hinck AP. ALK1 signaling in development and disease: new  
2 paradigms. *Cellular and Molecular Life Sciences*. 2017;74:4539-4560.
- 3 7. David L, Mallet C, Mazerbourg S, Feige JJ and Bailly S. Identification of BMP9 and  
4 BMP10 as functional activators of the orphan activin receptor-like kinase 1 (ALK1) in  
5 endothelial cells. *Blood*. 2007;109:1953-61.
- 6 8. Ruiz-Llorente L, Gallardo-Vara E, Rossi E, Smadja DM, Botella LM and Bernabeu  
7 C. Endoglin and alk1 as therapeutic targets for hereditary hemorrhagic telangiectasia.  
8 *Expert Opinion on Therapeutic Targets*. 2017;21:933-947.
- 9 9. Snellings DA, Gallione CJ, Clark DS, Vozoris NT, Faughnan ME and Marchuk DA.  
10 Somatic Mutations in Vascular Malformations of Hereditary Hemorrhagic Telangiectasia  
11 Result in Bi-allelic Loss of ENG or ACVRL1. *American Journal of Human Genetics*.  
12 2019;105:894-906.
- 13 10. Govani FS and Shovlin CL. Hereditary haemorrhagic telangiectasia: A clinical and  
14 scientific review. *European Journal of Human Genetics*. 2009;17:860-871.
- 15 11. McDonald J, Bayrak-Toydemir P and Pyeritz RE. Hereditary hemorrhagic  
16 telangiectasia: An overview of diagnosis, management, and pathogenesis. *Genetics in*  
17 *Medicine*. 2011;13:607-616.
- 18 12. Tual-Chalot S, Mahmoud M, Allinson KR, Redgrave RE, Zhai Z, Oh SP, Fruttiger  
19 M and Arthur HM. Endothelial depletion of Acvrl1 in mice leads to arteriovenous  
20 malformations associated with reduced endoglin expression. *PLoS One*. 2014;9:e98646.
- 21 13. Ola R, Dubrac A, Han J, Zhang F, Fang JS, Larrivé B, Lee M, Urarte AA,  
22 Kraehling JR, Genet G, Hirschi KK, Sessa WC, Canals FV, Graupera M, Yan M, Young  
23 LH, Oh PS and Eichmann A. PI3 kinase inhibition improves vascular malformations in

- 1 mouse models of hereditary haemorrhagic telangiectasia. *Nature Communications*.  
2 2016;7:13650.
- 3 14. Ola R, Künzel Sandrine H, Zhang F, Genet G, Chakraborty R, Pibouin-Fragner L,  
4 Martin K, Sessa W, Dubrac A and Eichmann A. SMAD4 Prevents Flow Induced  
5 Arteriovenous Malformations by Inhibiting Casein Kinase 2. *Circulation*. 2018;138:2379-  
6 2394.
- 7 15. Baeyens N, Larrivée B, Ola R, Hayward-Piatkowskyi B, Dubrac A, Huang B, Ross  
8 TD, Coon BG, Min E, Tsarfati M, Tong H, Eichmann A and Schwartz MA. Defective fluid  
9 shear stress mechanotransduction mediates hereditary hemorrhagic telangiectasia. *The*  
10 *Journal of Cell Biology*. 2016;214:807.
- 11 16. Capasso TL, Li B, Volek HJ, Khalid W, Rochon ER, Anbalagan A, Herdman C,  
12 Yost HJ, Villanueva FS, Kim K and Roman BL. BMP10-mediated ALK1 signaling is  
13 continuously required for vascular development and maintenance. *Angiogenesis*.  
14 2020;23:203-220.
- 15 17. Rochon ER, Menon PG and Roman BL. Alk1 controls arterial endothelial cell  
16 migration in lumenized vessels. *Development*. 2016;143:2593-602.
- 17 18. Han C, Choe S-w, Kim YH, Acharya AP, Keselowsky BG, Sorg BS, Lee Y-J and  
18 Oh SP. VEGF neutralization can prevent and normalize arteriovenous malformations in  
19 an animal model for hereditary hemorrhagic telangiectasia 2. *Angiogenesis*. 2014;17:823-  
20 830.
- 21 19. Jin Y, Muhl L, Burmakin M, Wang Y, Duchez AC, Betsholtz C, Arthur HM and  
22 Jakobsson L. Endoglin prevents vascular malformation by regulating flow-induced cell



- 1 migration and specification through VEGFR2 signalling. *Nature Cell Biology*.  
2 2017;19:639-652.
- 3 20. Alsina-Sanchís E, García-Ibáñez Y, Figueiredo AM, Riera-Domingo C, Figueras A,  
4 Matias-Guiu X, Casanovas O, Botella LM, Pujana MA, Riera-Mestre A, Graupera M and  
5 Viñals F. ALK1 Loss Results in Vascular Hyperplasia in Mice and Humans Through PI3K  
6 Activation. *Arterioscler Thromb Vasc Biol*. 2018;38:1216-1229.
- 7 21. Iriarte A, Figueras A, Cerdà P, Mora JM, Jucglà A, Penín R, Viñals F and Riera-  
8 Mestre A. PI3K (Phosphatidylinositol 3-Kinase) Activation and Endothelial Cell  
9 Proliferation in Patients with Hemorrhagic Hereditary Telangiectasia Type 1. *Cells*. 2019;8.
- 10 22. Carvalho JR, Fortunato IC, Fonseca CG, Pezzarossa A, Barbacena P,  
11 Dominguez-Cejudo MA, Vasconcelos FF, Santos NC, Carvalho FA and Franco CA. Non-  
12 canonical Wnt signaling regulates junctional mechanocoupling during angiogenic  
13 collective cell migration. *eLife*. 2019;8:e45853.
- 14 23. Pu W, Zhang H, Huang X, Tian X, He L, Wang Y, Zhang L, Liu Q, Li Y, Li Y, Zhao  
15 H, Liu K, Lu J, Zhou Y, Huang P, Nie Y, Yan Y, Hui L, Lui KO and Zhou B. Mfsd2a+  
16 hepatocytes repopulate the liver during injury and regeneration. *Nat Commun*.  
17 2016;7:13369.
- 18 24. Pu W, He L, Han X, Tian X, Li Y, Zhang H, Liu Q, Huang X, Zhang L, Wang QD,  
19 Yu Z, Yang X, Smart N and Zhou B. Genetic Targeting of Organ-Specific Blood Vessels.  
20 *Circ Res*. 2018;123:86-99.
- 21 25. Chow BW, Nuñez V, Kaplan L, Granger AJ, Bistrong K, Zucker HL, Kumar P,  
22 Sabatini BL and Gu C. Caveolae in CNS arterioles mediate neurovascular coupling.  
23 *Nature*. 2020;579:106-110.

- 1 26. Pitulescu ME, Schmidt I, Giaimo BD, Antoine T, Berkenfeld F, Ferrante F, Park H,  
2 Ehling M, Biljes D, Rocha SF, Langen UH, Stehling M, Nagasawa T, Ferrara N, Borggrefe  
3 T and Adams RH. Dll4 and Notch signalling couples sprouting angiogenesis and artery  
4 formation. *Nature Cell Biology*. 2017;19:915.
- 5 27. Xu C, Hasan SS, Schmidt I, Rocha SF, Pitulescu ME, Bussmann J, Meyen D, Raz  
6 E, Adams RH and Siekmann AF. Arteries are formed by vein-derived endothelial tip cells.  
7 *Nature Communications*. 2014;5:5758.
- 8 28. Ehling M, Adams S, Benedito R and Adams RH. Notch controls retinal blood vessel  
9 maturation and quiescence. *Development*. 2013;140:3051.
- 10 29. Muzumdar MD, Tasic B, Miyamichi K, Li L and Luo L. A global double-fluorescent  
11 Cre reporter mouse. *Genesis*. 2007;45:593-605.
- 12 30. Melchior B and Frangos JA. Distinctive subcellular Akt-1 responses to shear stress  
13 in endothelial cells. *Journal of Cellular Biochemistry*. 2014;115:121-129.
- 14 31. Várnai P and Balla T. Visualization of phosphoinositides that bind pleckstrin  
15 homology domains: Calcium- and agonist-induced dynamic changes and relationship to  
16 myo-[<sup>3</sup>H]inositol-labeled phosphoinositide pools. *Journal of Cell Biology*. 1998;143:501-  
17 510.
- 18 32. Etienne-Manneville S and Hall A. Integrin-mediated activation of Cdc42 controls  
19 cell polarity in migrating astrocytes through PKCzeta. *Cell*. 2001;106:489-98.
- 20 33. Tzima E, Kiosses WB, del Pozo MA and Schwartz MA. Localized cdc42 activation,  
21 detected using a novel assay, mediates microtubule organizing center positioning in  
22 endothelial cells in response to fluid shear stress. *J Biol Chem*. 2003;278:31020-3.

- 1 34. Tzima E, Irani-Tehrani M, Kiosses WB, Dejana E, Schultz DA, Engelhardt B, Cao  
2 G, DeLisser H and Schwartz MA. A mechanosensory complex that mediates the  
3 endothelial cell response to fluid shear stress. *Nature*. 2005;437:426-31.
- 4 35. Somanath PR, Malinin NL and Byzova TV. Cooperation between integrin  $\alpha\beta 3$  and  
5 VEGFR2 in angiogenesis. *Angiogenesis*. 2009;12:177-185.
- 6 36. Simons M. An inside view: VEGF receptor trafficking and signaling. *Physiology*  
7 *(Bethesda)*. 2012;27:213-22.
- 8 37. Serini G, Napione L, Arese M and Bussolino F. Besides adhesion: new  
9 perspectives of integrin functions in angiogenesis. *Cardiovascular Research*.  
10 2008;78:213-222.
- 11 38. Neto F, Klaus-Bergmann A, Ong YT, Alt S, Vion A-C, Szymborska A, Carvalho JR,  
12 Hollfinger I, Bartels-Klein E, Franco CA, Potente M and Gerhardt H. YAP and TAZ  
13 regulate adherens junction dynamics and endothelial cell distribution during vascular  
14 development. *eLife*. 2018;7:e31037.
- 15 39. Nakajima H, Yamamoto K, Agarwala S, Terai K, Fukui H, Fukuhara S, Ando K,  
16 Miyazaki T, Yokota Y, Schmelzer E, Belting H-G, Affolter M, Lecaudey V and Mochizuki  
17 N. Flow-Dependent Endothelial YAP Regulation Contributes to Vessel Maintenance.  
18 *Developmental Cell*. 2017;40:523-536.e6.
- 19 40. Wang L, Luo JY, Li B, Tian XY, Chen LJ, Huang Y, Liu J, Deng D, Lau CW, Wan  
20 S, Ai D, Mak KK, Tong KK, Kwan KM, Wang N, Chiu JJ, Zhu Y and Huang Y. Integrin-  
21 YAP/TAZ-JNK cascade mediates atheroprotective effect of unidirectional shear flow.  
22 *Nature*. 2016;540:579-582.

- 1 41. Li B, He J, Lv H, Liu Y, Lv X, Zhang C, Zhu Y and Ai D. c-Abl regulates YAP<sup>Y357</sup>  
2 phosphorylation to activate endothelial atherogenic responses to disturbed flow. *J Clin*  
3 *Invest.* 2019;129:1167-1179.
- 4 42. Dupont S. Role of YAP/TAZ in cell-matrix adhesion-mediated signalling and  
5 mechanotransduction. *Exp Cell Res.* 2016;343:42-53.
- 6 43. Sakabe M, Fan J, Odaka Y, Liu N, Hassan A, Duan X, Stump P, Byerly L,  
7 Donaldson M, Hao J, Fruttiger M, Lu QR, Zheng Y, Lang RA and Xin M. YAP/TAZ-CDC42  
8 signaling regulates vascular tip cell migration. *Proc Natl Acad Sci U S A.* 2017;114:10918-  
9 10923.
- 10 44. Kim J, Kim YH, Kim J, Park DY, Bae H, Lee DH, Kim KH, Hong SP, Jang SP,  
11 Kubota Y, Kwon YG, Lim DS and Koh GY. YAP/TAZ regulates sprouting angiogenesis  
12 and vascular barrier maturation. *J Clin Invest.* 2017;127:3441-3461.
- 13 45. Franco CA, Jones ML, Bernabeu MO, Geudens I, Mathivet T, Rosa A, Lopes FM,  
14 Lima AP, Ragab A, Collins RT, Phng L-K, Coveney PV and Gerhardt H. Dynamic  
15 Endothelial Cell Rearrangements Drive Developmental Vessel Regression. *PLOS*  
16 *Biology.* 2015;13:e1002125.
- 17 46. Fonseca CG, Barbacena P and Franco CA. Endothelial cells on the move:  
18 dynamics in vascular morphogenesis and disease. *Vasc Biol.* 2020;2:H29-h43.
- 19 47. Chow BW and Gu C. Gradual Suppression of Transcytosis Governs Functional  
20 Blood-Retinal Barrier Formation. *Neuron.* 2017;93:1325-1333.e3.
- 21 48. Singh E, Redgrave RE, Phillips HM and Arthur HM. Arterial endoglin does not  
22 protect against arteriovenous malformations. *Angiogenesis.* 2020;23:559-566.

- 1 49. Corti P, Young S, Chen CY, Patrick MJ, Rochon ER, Pekkan K and Roman BL.  
2 Interaction between alk1 and blood flow in the development of arteriovenous  
3 malformations. *Development*. 2011;138:1573-82.
- 4 50. Tual-Chalot S, Garcia-Collado M, Redgrave RE, Singh E, Davison B, Park C, Lin  
5 H, Luli S, Jin Y, Wang Y, Lawrie A, Jakobsson L and Arthur HM. Loss of endothelial  
6 endoglin promotes high-output heart failure through peripheral arteriovenous shunting  
7 driven by VEGF signaling. *Circulation Research*. 2020:243-257.
- 8 51. Thalgott JH, Dos-Santos-Luis D, Hosman AE, Martin S, Lamandé N, Bracquart D,  
9 Srun S, Galaris G, De Boer HC, Tual-Chalot S, Kroon S, Arthur HM, Cao Y, Snijder RJ,  
10 Disch F, Mager JJ, Rabelink TJ, Mummery CL, Raymond K and Lebrin F. Decreased  
11 expression of vascular endothelial growth factor receptor 1 contributes to the  
12 pathogenesis of hereditary hemorrhagic telangiectasia type 2. *Circulation*.  
13 2018;138:2698-2712.
- 14 52. Ruiz S, Zhao H, Chandakkar P, Papoin J, Choi H, Nomura-Kitabayashi A, Patel R,  
15 Gillen M, Diao L, Chatterjee PK, He M, Al-Abed Y, Wang P, Metz CN, Oh SP, Blanc L,  
16 Campagne F and Marambaud P. Correcting Smad1/5/8, mTOR, and VEGFR2 treats  
17 pathology in hereditary hemorrhagic telangiectasia models. *Journal of Clinical*  
18 *Investigation*. 2020;130:942-957.
- 19 53. Hwan Kim Y, Vu PN, Choe SW, Jeon CJ, Arthur HM, Vary CPH, Lee YJ and Oh  
20 SP. Overexpression of Activin Receptor-Like Kinase 1 in Endothelial Cells Suppresses  
21 Development of Arteriovenous Malformations in Mouse Models of Hereditary  
22 Hemorrhagic Telangiectasia. *Circ Res*. 2020;127:1122-1137.

- 1 54. Crist AM, Zhou X, Garai J, Lee AR, Thoele J, Ullmer C, Klein C, Zabaleta J and  
2 Meadows SM. Angiopoietin-2 Inhibition Rescues Arteriovenous Malformation in a Smad4  
3 Hereditary Hemorrhagic Telangiectasia Mouse Model. *Circulation*. 2019;139:2049-2063.
- 4 55. Xanthis I, Souilhol C, Serbanovic-Canic J, Roddie H, Kalli AC, Fragiadaki M, Wong  
5 R, Shah DR, Askari JA, Canham L, Akhtar N, Feng S, Ridger V, Waltho J, Pinteaux E,  
6 Humphries MJ, Bryan MT and Evans PC.  $\beta$ 1 integrin is a sensor of blood flow direction.  
7 *Journal of Cell Science*. 2019;132.
- 8 56. Urbich C, Walter DH, Zeiher AM and Dimmeler S. Laminar shear stress  
9 upregulates integrin expression role in endothelial cell adhesion and apoptosis.  
10 *Circulation Research*. 2000;87:683-689.
- 11 57. Tzima E, Del Pozo MA, Shattil SJ, Chien S and Schwartz MA. Activation of  
12 integrins in endothelial cells by fluid shear stress mediates Rho-dependent cytoskeletal  
13 alignment. *EMBO Journal*. 2001;20:4639-4647.
- 14 58. Stupp R, Hegi ME, Gorlia T, Erridge SC, Perry J, Hong YK, Aldape KD, Lhermitte  
15 B, Pietsch T, Grujcic D, Steinbach JP, Wick W, Tarnawski R, Nam DH, Hau P,  
16 Weyerbrock A, Taphoorn MJ, Shen CC, Rao N, Thurzo L, Herrlinger U, Gupta T,  
17 Kortmann RD, Adamska K, McBain C, Brandes AA, Tonn JC, Schnell O, Wiegel T, Kim  
18 CY, Nabors LB, Reardon DA, van den Bent MJ, Hicking C, Markivskyy A, Picard M, Weller  
19 M, European Organisation for R, Treatment of C, Canadian Brain Tumor C and team Cs.  
20 Cilengitide combined with standard treatment for patients with newly diagnosed  
21 glioblastoma with methylated MGMT promoter (CENTRIC EORTC 26071-22072 study):  
22 a multicentre, randomised, open-label, phase 3 trial. *The Lancet Oncology*.  
23 2014;15:1100-1108.

- 1 59. Wang X, Freire Valls A, Schermann G, Shen Y, Moya IM, Castro L, Urban S,  
2 Solecki GM, Winkler F, Riedemann L, Jain RK, Mazzone M, Schmidt T, Fischer T, Halder  
3 G and Ruiz de Almodóvar C. YAP/TAZ Orchestrate VEGF Signaling during  
4 Developmental Angiogenesis. *Developmental Cell*. 2017;42:462-478.e7.
- 5 60. Wang K-C, Yeh Y-T, Nguyen P, Limqueco E, Lopez J, Thorossian S, Guan K-L, Li  
6 Y-SJ and Chien S. Flow-dependent YAP/TAZ activities regulate endothelial phenotypes  
7 and atherosclerosis. *Proceedings of the National Academy of Sciences*. 2016;113:11525.
- 8 61. Kim J, Kim YH, Kim J, Park DY, Bae H, Lee D-H, Kim KH, Hong SP, Jang SP,  
9 Kubota Y, Kwon Y-G, Lim D-S and Koh GY. YAP/TAZ regulates sprouting angiogenesis  
10 and vascular barrier maturation. *The Journal of Clinical Investigation*. 2017;127:3441-  
11 3461.
- 12 62. Boopathy GTK and Hong W. Role of Hippo Pathway-YAP/TAZ signaling in  
13 angiogenesis. *Frontiers in Cell and Developmental Biology*. 2019;7.
- 14 63. Laviña B, Castro M, Niaudet C, Cruys B, Álvarez-Aznar A, Carmeliet P, Bentley K,  
15 Brakebusch C, Betsholtz C and Gaengel K. Defective endothelial cell migration in the  
16 absence of Cdc42 leads to capillary-venous malformations. *Development (Cambridge)*.  
17 2018;145.
- 18 64. Myo-Hyeon P, Kim AK, Manandhar S, Su-Young O, Gun-Hyuk J, Kang L, Dong-  
19 Won L, Hyeon DY, Sun-Hee L, Lee HE, Tae-Lin H, Heon Suh S, Hwang D, Byun K, Hae-  
20 Chul P and Lee YM. CCN1 interlinks integrin and hippo pathway to autoregulate tip cell  
21 activity. *eLife*. 2019;8.
- 22 65. Gibault F, Bailly F, Corvaisier M, Coevoet M, Huet G, Melnyk P and Cotellet P.  
23 Molecular Features of the YAP Inhibitor Verteporfin: Synthesis of Hexasubstituted

- 1 Dipyrrins as Potential Inhibitors of YAP/TAZ, the Downstream Effectors of the Hippo  
2 Pathway. *ChemMedChem*. 2017;12:954-961.
- 3 66. Chan WM, Lim TH, Pece A, Silva R and Yoshimura N. Verteporfin PDT for non-  
4 standard indications-a review of current literature. *Graefe's Archive for Clinical and*  
5 *Experimental Ophthalmology*. 2010;248:613-626.
- 6 67. Messmer KJ and Abel SR. Verteporfin for Age-Related Macular Degeneration.  
7 *Annals of Pharmacotherapy*. 2001;35:1593-1598.
- 8 68. Kim N-G and Gumbiner BM. Adhesion to fibronectin regulates Hippo signaling via  
9 the FAK–Src–PI3K pathway. *The Journal of Cell Biology*. 2015;210:503.

10



## 1 **Figure Legends**

### 2 **Figure 1. Retinal endothelial cell lineage tracing**

3 (A-I) P6 retina flat mount images labeled with IB4 (blue) and GFP (white) from *Mfsd2a*  
4 *Cre<sup>ERT2</sup> mTmG* (A, D, G), *Esm1 Cre<sup>ERT2</sup> mTmG* (B, E, H) and *Bmx Cre<sup>ERT2</sup> mTmG* (C, F,  
5 I) mice injected with 100 µg Tx at P5.5 (12 h, A-C), P5 (for 24 h, D-F) and P4 (for 48 h,  
6 G-I) and dissected at P6. (J) 100 µg Tx was injected at P6 and dissected after 6 h in  
7 *Mfsd2a Cre<sup>ERT2</sup> mTmG* mice. (K) 100 µg Tx was injected at P4 and dissected after 400 h  
8 (P21) (L) 2 mg/kg Tx was injected in P20 *Mfsd2a Cre<sup>ERT2</sup> mTmG* mice and dissect at P21.  
9 Yellow arrows indicate tip cells and red arrows indicate location of GFP-expressing ECs  
10 in arteries. (M) Quantification of *Mfsd2a Cre<sup>ERT2</sup> mTmG* GFP expressing vessel length  
11 over IB4 positive vessel length from optic nerve. n = 6-8 retinas per time point. P-value <  
12 0.001, Error bars: SEM. \*P-value < 0.05, \*\*P-value < 0.01, \*\*\*P-value < 0.001, ns:  
13 nonsignificant, One-way ANOVA. ON: optic nerve, V: vein, A: artery, Scale bars: 500 µm  
14 (A-K) and 50 µm (L).

### 15 **Figure 2. Capillary-venous loss of ALK1 leads to retinal and brain AVMs.**

16 (A) Schematic representation of the experimental strategy used to delete *Alk1* in mice  
17 (P4-P6). (B-D) P6 retina flat mount images labeled with IB4 (blue) and GFP (white) from  
18 *Alk1<sup>ff</sup> Mfsd2a Cre<sup>ERT2</sup> mTmG* (B), *Alk1<sup>ff</sup> Esm1 Cre<sup>ERT2</sup> mTmG* (C) and *Alk1<sup>ff</sup> Bmx Cre<sup>ERT2</sup>*  
19 *mTmG* pups (D) injected with 100 µg Tx at P4 and dissected at P6. White arrows indicate  
20 AVMs. (E-G) Quantification of AVM number. n = 6-11 mice per group. Error bars: SEM.  
21 \*\*\*\* P-value < 0.0001, two-tailed unpaired t-test. (H-K) Vascular labeling with latex dye  
22 (red) of retinal and brain vessels in *Alk1<sup>ff</sup>* (H and I) and *Alk1<sup>ff</sup> Mfsd2a Cre<sup>ERT2</sup>* (J and K)

1 P6 pups. White arrows indicate AVMs. (L) Schematic representation of the experimental  
2 strategy used to delete *Alk1* in mice (P1-P6). Arrowheads indicate injection of 100  $\mu$ g Tx  
3 at P1, P2 and P3 in *Alk1<sup>ff</sup> Esm1* and *Bmx Cre<sup>ERT2</sup> mTmG* pups. (M and N) IB4 (blue) and  
4 GFP (white) staining of retinal flat mount from *Alk1<sup>ff</sup> Esm1 Cre<sup>ERT2</sup> mTmG* (M) and *Alk1<sup>ff</sup>*  
5 *Bmx Cre<sup>ERT2</sup> mTmG* (N). Scale bars: 500  $\mu$ m (B-D, M-N), 200  $\mu$ m (H and J), 2 mm (I  
6 and K).

7 **Figure 3. *Alk1<sup>ff</sup> Esm1 Cre<sup>ERT2</sup> mTmG* mice display vascular malformations.**

8 (A) Survival curves for *Alk1<sup>ff</sup> Mfsd2aCre<sup>ERT2</sup>*, *Alk1<sup>ff</sup> Esm1Cre<sup>ERT2</sup>* and *Alk1<sup>ff</sup> BmxCre<sup>ERT2</sup>*  
9 mice injected with 100  $\mu$ g Tx at P4. n = 8-10 mice/group. (B) Freshly dissected small  
10 intestines from P14 mice with the indicated genotypes after 100  $\mu$ g Tx injection at P4.  
11 *Alk1<sup>ff</sup> Esm1 Cre<sup>ERT2</sup> mTmG* mice displayed intestinal hemorrhage. (C and D) GFP (white)  
12 and VE-Cad (blue) staining of mesentery and gastrointestinal (GI) tract (C) and lacteals  
13 (D) from P14 *Esm1 Cre<sup>ERT2</sup> mTmG*. 100  $\mu$ g Tx was injected at P4. An arrow indicates  
14 *Esm1* positive capillary ECs (C). (E and F) VE-Cad (blue) and GFP (white) staining of  
15 jejunum lacteals from P14 *Alk1<sup>ff</sup>* (E) and *Alk1<sup>ff</sup> Esm1 Cre<sup>ERT2</sup> mTmG* (F). (G-J and M-P)  
16 100  $\mu$ g Tx was injected at P4 and dissected at P12. Vascular labeling with latex dye (red)  
17 of villi, GI tracts, retinas and brains in *Alk1<sup>ff</sup>* (G, I, M and O) and *Alk1<sup>ff</sup> Esm1 Cre<sup>ERT2</sup>* (H,  
18 J, N and P) P12 pups. (K and L) 100  $\mu$ g Tx was injected at P4 and dissected at P12 (K  
19 and L). IB4 (blue) and GFP (white) staining of retinal flat mounts from *Esm1 Cre<sup>ERT2</sup>*  
20 *mTmG* (K) and *Alk1<sup>ff</sup> Esm1 Cre<sup>ERT2</sup> mTmG* (L) P12 mice. An arrow indicates vascular  
21 malformations (J, L and N). A: artery, V: vein, Scale bars: 1 cm (B), 400  $\mu$ m (C), 1 mm  
22 (I-J and M-P), 500  $\mu$ m (K-N), 200  $\mu$ m (G and H), 25  $\mu$ m (D-F).

1 **Figure 4. ALK1 controls cell polarization against the blood flow direction.**

2 (A-B) IB4 (Magenta) and ALK1 (white) staining of retinal flat mounts from *Alk1<sup>ff</sup>* (A) and  
3 *Alk1<sup>ff</sup> Mfsd2a Cre<sup>ERT2</sup>* (B) pups injected with 100  $\mu$ g Tx at P4 and dissected at P6. (C-F)  
4 Higher magnification of insets in A and B. GOLPH4 (green) and DAPI (blue) staining of  
5 retina flat mounts. Red arrows indicate the blood flow direction. (C'-F') Background  
6 images from Figure 2 C-F and corresponding polarity vectors (black arrows). (G) The  
7 polarity axis of each cell was defined as the angle between the direction of blood flow and  
8 the cell polarity axis, defined by a vector drawn from the center of the cell nucleus to the  
9 center of the Golgi apparatus. (H) Angular histograms showing the distribution of  
10 polarization angles of ECs in the artery, vein and capillaries from *Alk1<sup>ff</sup>* and artery, vein,  
11 capillary and AVM from *Alk1<sup>ff</sup> Mfsd2a Cre<sup>ERT2</sup>* mouse retinas. n = 7-11 retinas. (I) PI box  
12 plots of ECs from artery, vein and capillary from *Alk1<sup>ff</sup>* and artery, vein, capillary and AVM  
13 from *Alk1<sup>ff</sup> Mfsd2a Cre<sup>ERT2</sup>* P6 retinas. n = 7-11 retinas. (J and K) IB4 (gray) staining of  
14 retinal flat mounts from *Alk1<sup>ff</sup> Mfsd2a Cre<sup>ERT2</sup>* pups injected with 100  $\mu$ g at P4 and  
15 dissected after 24 h (P5) (J) and 36 h (P5.5) (K). (L) Angular histograms showing the  
16 distribution of polarization angles of ECs in the artery, vein and capillary from *Alk1<sup>ff</sup>* and  
17 *Alk1<sup>ff</sup> Mfsd2a Cre<sup>ERT2</sup>* P5 retinas at 24 h after Tx injection. (M) PI box plots of ECs from  
18 artery, vein and capillary from *Alk1<sup>ff</sup>* and *Alk1<sup>ff</sup> Mfsd2a Cre<sup>ERT2</sup>* retinas at 24 h after Tx  
19 injection. n = 5-8 retinas/group. Error bars: SEM. \*\*P-value < 0.01, \*\*\*P-value < 0.001,  
20 ns: nonsignificant, two-tailed unpaired t-test. Scale bars: 100  $\mu$ m (A-B), 20  $\mu$ m (C-F) and  
21 500  $\mu$ m (J-K)

22

1 **Figure 5. ALK1 controls EC polarization against the flow direction *in vitro*.**

2 (A-B) Representative images of wound-healing assays after 18 h showing polarity angles  
3 of HUVECs transfected with Control (*siCon*) (A) or *ALK1* (*siALK1*) (B) siRNAs under static  
4 conditions and immunolabeled with phalloidin(red), GM130 (green), and DAPI (blue). (E-  
5 F) Representative images of wound-healing assays showing polarity angles of *siCon* (E)  
6 or *siALK1* (F) HUVECs with 18 h exposure to laminar shear stress (LSS) at 15 dynes/cm<sup>2</sup>.  
7 Left panels are upstream and right panels are downstream of flow. (C-D and G-H) Angular  
8 histograms showing polarization angles of *siCon* (C and G) or *siALK1* ECs (D and H) at  
9 18 h after scratch with (G-H) or without (C-D) LSS. Left is upstream and right is  
10 downstream of flow (G and H). (I) PI box plots of upstream (left) scratch areas from *siCon*  
11 or *siALK1* transfected HUVECs at 18 h after with or without LSS. (C-I) n=6-8 images from  
12 3 independent experiments. Error bars: SEM. \*P-value < 0.05, \*\*P-value < 0.01, \*\*\*P-  
13 value < 0.001, two-tailed unpaired t-test. (J) Representative time lapse images of *siCon*  
14 or *siALK1* HUVECs stably transduced with PH-AKT-mClover3 and plasma membrane  
15 targeting sequence of LCK-mRuby3. HUVEC monolayers in microfluidic chambers were  
16 exposed to 12 dynes/cm<sup>2</sup> LSS under the microscope. 5 min (static) and 12 min (LSS)  
17 images were selected from the movies. The surface is color-coded by the value of PH-  
18 AKT intensity. (K) Local activation of PI3K was quantified by image analysis. PH-AKT  
19 intensity was normalized with average static intensity at each time point. 0 - 5 min : static  
20 and 5 - 24.5 min : LSS, n= 61, 41 cells from 3 independent experiments, Error bar : SEM.  
21 \*\*\*P-value < 0.001, two-tailed unpaired t-test. Scale bars : 50  $\mu$ m (A-B and E-F), 20  $\mu$ m  
22 (J).

23

1 **Figure 6. Integrin inhibition prevents AVM formation in *Alk1* mutant retinas.**  
2 (A-C) IB4 (Magenta) and ITGB1(A, white), ITGA5 (B, white) or ITGAV (C, white) staining  
3 of retinal flat mounts from P8 *Alk1<sup>ff</sup> Mfsd2a Cre<sup>ERT2</sup>* pups. (D) VEGFR2  
4 immunoprecipitation in *siCon* or *siALK1* HUVECs and western blot analysis for ITGB1,  
5 ITGA5 and ITGAV. VEGFR2, ITGB1, ITGA5, ITGAV, ALK1 and  $\beta$ -actin expression from  
6 the total cell lysates are shown as loading controls. (E) Quantification of ITGB1, ITGA5 or  
7 ITGAV levels normalized to VEGFR2 from immunoprecipitation. \*\*P<0.01, \*\*\*P-value <  
8 0.001, two-tailed unpaired t-test. (F) Experimental strategy to assess the effects of  
9 integrin inhibitors in *Alk1* deleted retinas. Arrowheads indicate the time course of Tx (100  
10  $\mu$ g) and Cilengitide (5mg/kg), ATN161 (5mg/kg) or vehicle administration. (G-I and K-M)  
11 IB4 staining of P6 retinal flat mounts from *Alk1<sup>ff</sup> Mfsd2a Cre<sup>ERT2</sup>* (G-I) or *Alk1<sup>ff</sup> CDH5*  
12 *Cre<sup>ERT2</sup>* (K-M) injected with Cilengitide (H and L) or ATN161 (I and M) at P4 and P5. (J  
13 and N) Quantification of the AVM number. Each dot represents one retina. n = 7-16  
14 retinas per group. Error bars: SEM. \*\*\*P-value < 0.001, One-way ANOVA with Holm-  
15 Sidak test. (O-R) IB4 (Magenta), Alk1 (white), GOLPH4 (green) and DAPI (blue) staining  
16 of retina flat mounts from *Alk1<sup>ff</sup>* (O), *Alk1<sup>ff</sup> Mfsd2a Cre<sup>ERT2</sup>* (P), Cilengitide (Q) or ATN161  
17 (R) injected *Alk1<sup>ff</sup> Mfsd2a Cre<sup>ERT2</sup>* pups. A: artery, V: vein, (S) PI box plots of ECs from  
18 artery and vein from *Alk1<sup>ff</sup>*, *Alk1<sup>ff</sup> Mfsd2a Cre<sup>ERT2</sup>*, Cilengitide or ATN161 injected *Alk1<sup>ff</sup>*  
19 *Mfsd2a Cre<sup>ERT2</sup>* retinas. n=5-8 retinas/group. Error bars: SEM. \*P-value < 0.05, \*\*P-value  
20 < 0.01, ns: nonsignificant, One-way ANOVA with Holm-Sidak test. Scale bars: 500  $\mu$ m  
21 (A-C, G-I and K-M), 20  $\mu$ m (O-R).

22

1 **Figure 7. ALK1 controls YAP/TAZ expression and localization.**

2 (A) Western blot analysis of HUVECs transfected with control and *ALK1* siRNAs followed  
3 by 18 h exposure to LSS (15 dynes/cm<sup>2</sup>). (B) Quantification of ITGB1, ITGA5, ITGAV,  
4 YAP or TAZ levels normalized to  $\beta$ -actin. \*P<0.05, \*\*P<0.01, \*\*\*P<0.001, two-tailed  
5 unpaired t-test. (C-F) YAP and TAZ (green), ALK1 (gray), IB4 (red), DAPI (blue) staining  
6 of retinal flat mounts from P8 *Alk1<sup>ff</sup>* (C-D) or *Alk1<sup>ff</sup> Mfsd2aCre<sup>ERT2</sup>* (E-F) pups. A scale  
7 bar: 20  $\mu$ m (A-F) (G) YAP or TAZ (green) and *Alk1* (red) staining of *siCon* and *siALK1*  
8 HUVECs. A scale bar: 50  $\mu$ m. (H) Quantification of YAP and TAZ localization from *siCon*  
9 and *siALK1* transfected HUVECs. \*\*\*P<0.001, n = 3 independent experiments. Multiple  
10 comparisons with Holm-Sidak test.

11 **Figure 8. YAP/TAZ inhibition improves AVM formation in *Alk1* mutant retinas.**

12 (A) YAP and TAZ staining of *siCon*, *ALK1*, *SMAD4* or *ENG* siRNAs transfected HUVECs  
13 treated with DMSO or Verteporfin (VP, 5  $\mu$ M) for 6 h. Nuclear YAP/TAZ localization in  
14 *siALK1*, *siSMAD4* or *siENG* ECs is blocked by VP treatment. A scale bar: 50  $\mu$ m. (B)  
15 Experimental strategy to assess the effects of YAP/TAZ inhibition in EC specific *Alk1*  
16 deleted vasculature. Arrowheads indicate the time course of Tx (100  $\mu$ g) and VP  
17 (50mg/kg) or vehicle administration. (C) IB4 staining of P6 retinal flat mounts from VP  
18 injected *Alk1<sup>ff</sup>*, *Alk1<sup>ff</sup> CDH5 Cre<sup>ERT2</sup>* or *Alk1<sup>ff</sup> Mfsd2a Cre<sup>ERT2</sup>* mice. (D) Stereomicroscopy  
19 images of vehicle or VP injected *Alk1<sup>ff</sup> Mfsd2a Cre<sup>ERT2</sup>* retinas. (E) Quantification of the  
20 AVM number/retina. Each dot represents one retina. n = 6-8 retinas per group. Error bars:  
21 SEM. \*\*\*P-value < 0.001, two-tailed unpaired t-test. (F) Angular histograms showing  
22 polarization angles of artery and vein from *Alk1<sup>ff</sup> Mfsd2a Cre<sup>ERT2</sup>* with VP. (G) PI box plots

1 of *Alk1<sup>ff</sup> Mfsd2a Cre<sup>ERT2</sup>* with vehicle or VP. n=5-6 retinas, Error bars: SEM, \*\*\*P-value <  
2 0.001, ns: nonsignificant, two-tailed unpaired t-test. Scale bars : 50  $\mu$ m (A), 500  $\mu$ m (C),  
3 300  $\mu$ m (D)

4 **Figure 9. Integrin acts upstream of YAP/TAZ in an ALK1 dependent manner.**

5 (A) YAP and TAZ staining for control, *ALK1* siRNAs transfected HUVECs treated with  
6 PBS, Cilengitide (Cil, 5  $\mu$ M) or ATN161 (ATN, 5  $\mu$ M) for 12 h. Nuclear YAP/TAZ  
7 localization in *siALK1* ECs is blocked by Cilengitide and ATN161 treatment. (B)  
8 Quantification of YAP and TAZ localization from *siCon* and *siALK1* transfected HUVECs.  
9 \*\*\*P<0.001, n = 3 independent experiments. Error bars: SEM. \*\*\*P-value < 0.001, ns:  
10 nonsignificant, Multiple comparisons with Holm-Sidak test. (C) YAP and TAZ (green),  
11 ALK1 (white), IB4 (red) and DAPI (blue) staining of retinal flat mounts from Cilengitide or  
12 ATN161 injected *Alk1<sup>ff</sup> Mfsd2a Cre<sup>ERT2</sup>* P6 mice. (D) A model for ALK1-integrin-YAP/TAZ  
13 signaling in maintenance of vascular quiescence. In quiescence, ALK1 signaling  
14 represses PI3K activation downstream of integrin-VEGFR2 signaling, through inhibition  
15 of YAP/TAZ expression and localization. ALK1 deletion results in increased integrin-  
16 VEGFR2 signaling, and consequently in excessive YAP/TAZ expression and localization  
17 to the nucleus, thereby inducing vascular defects. Blocking integrin-ECM interaction with  
18 integrin inhibitors or YAP/TAZ localization with YAP/TAZ inhibitor rescues vascular  
19 malformations in *Alk1* deficient mice. Scale bars: 50  $\mu$ m (A), 20  $\mu$ m (C)

20

21

1 **Supplemental Figure 1. *Mfsd2a* positive cells migrate against the direction of blood**  
2 **flow.**

3 (A) *Mfsd2a Cre<sup>ERT2</sup> mTmG* mice injected with 100 µg Tx at P6 and dissected after 4 h.  
4 GFP expressing ECs are located in capillaries and veins (red arrows) but not in arteries.  
5 (B) P6 retina flat mount images labeled with IB4 (blue) and GFP (white) from *Mfsd2a*  
6 *Cre<sup>ERT2</sup> mTmG* mice injected with 100 µg Tx at P5, dissected after 12h (P5.5) and cultured  
7 for an additional 12 h in vitro (P6). Yellow arrows indicate tip cells and red arrows indicate  
8 location of GFP-expressing ECs in arteries. ON: optic nerve, V: vein, A: artery, Scale bar:  
9 500 µm

10 **Supplemental Figure 2. Genetic deletion of *Alk1* in *Mfsd2a*, *Esm1* and *Bmx Cre<sup>ERT2</sup>***  
11 ***mTmG* retinas.**

12 (A-P) 100 µg Tx was injected intragastrically at P4 in *Alk1<sup>ff</sup>*, *Alk1<sup>ff</sup> Mfsd2a Cre<sup>ERT2</sup>*, *Alk1<sup>ff</sup>*  
13 *Esm1 Cre<sup>ERT2</sup>* and *Alk1<sup>ff</sup> Bmx Cre<sup>ERT2</sup> mTmG* pups, and retinas were dissected at P6.  
14 IB4 (blue), GFP (white) and ALK1 (red) staining of retinal flat mounts. GFP and ALK1  
15 staining shows non-overlapping expression. V: vein, A: artery, Scale bar: 200 µm

16 **Supplemental Figure 3. ALK1 regulates EC polarization against the direction of**  
17 **blood flow.**

18 Movies of *siCon* or *siALK1* HUVECs stably transduced with PH-AKT-mClover3 and  
19 plasma membrane targeting sequence of LCK-mRuby3. HUVEC monolayers in  
20 microfluidic chambers were exposed to 12 dynes/cm<sup>2</sup> LSS under microscope. 0 – 5 min  
21 is static condition and flow starts after 5 min. Color intensity indicates AKT-PH sensor. A  
22 scale bar : 20 µm



1 **Supplemental Figure 4. Integrin staining of *Alk1<sup>ff</sup>* retinas.**

2 (A-C) IB4 (Magenta) and ITGB1(A, white), ITGA5 (B, white) or ITGAV (C, white) staining  
3 of retinal flat mounts from P8 *Alk1<sup>ff</sup>* pups. A scale bar : 500  $\mu\text{m}$  (A-C)

4 **Supplemental Figure 5. PI3K acts upstream of YAP/TAZ.**

5 (A) YAP and TAZ staining for control, *ALK1* siRNAs transfected HUVECs treated with  
6 PBS, Wortmannin (100 nM) for 12 h. A scale bar: 50  $\mu\text{m}$

**Figure 1**

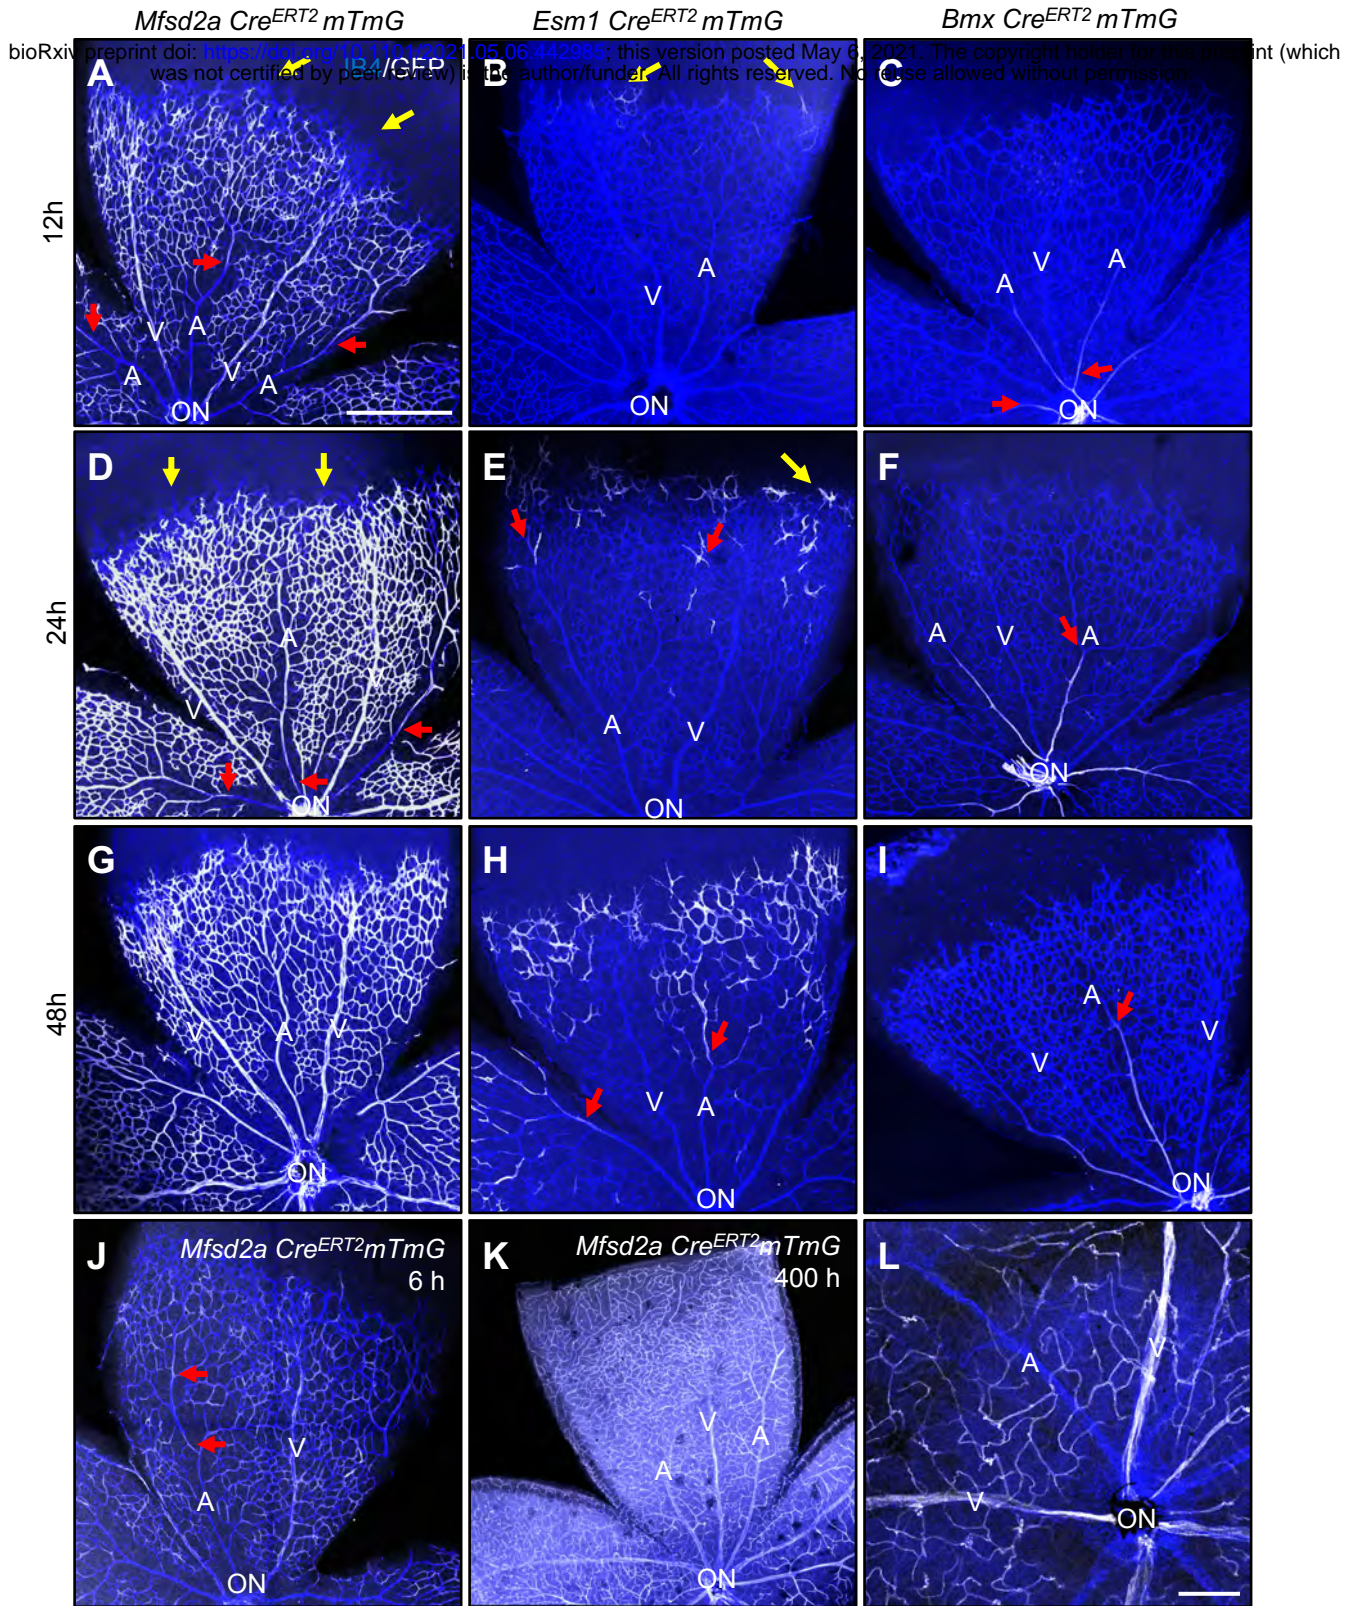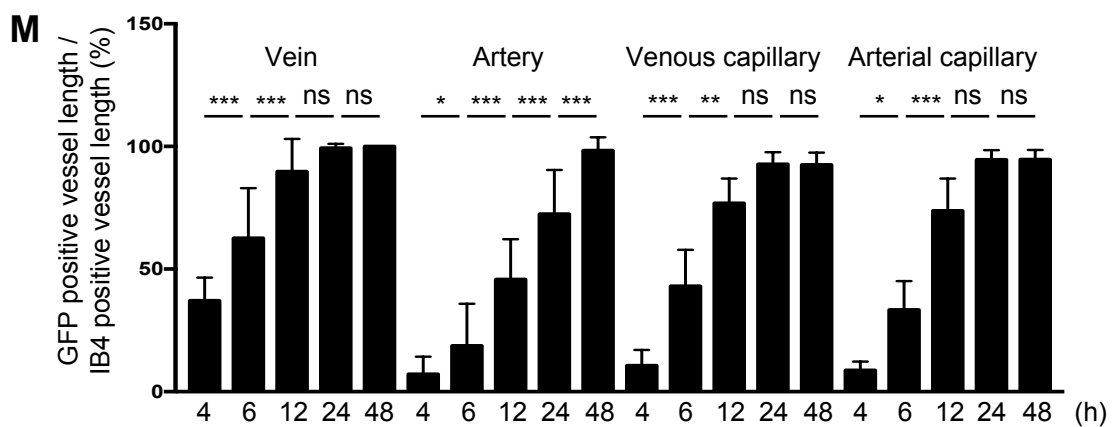

## Figure 1. Retinal endothelial cell lineage tracing

bioRxiv preprint doi: <https://doi.org/10.1101/2021.05.06.442985>; this version posted May 6, 2021. The copyright holder for this preprint (which was not certified by peer review) is the author/funder. All rights reserved. No reuse allowed without permission.

(A-I) P6 retinal flat mount images labeled with IB4 (blue) and GFP (white) from *Mfsd2a* *Cre<sup>ERT2</sup> mTmG* (A, D, G), *Esm1 Cre<sup>ERT2</sup> mTmG* (B, E, H) and *Bmx Cre<sup>ERT2</sup> mTmG* (C, F, I) mice injected with 100  $\mu$ g Tx at P5.5 (12 h, A-C), P5 (for 24 h, D-F) and P4 (for 48 h, G-I) and dissected at P6. (J) 100  $\mu$ g Tx was injected at P6 and dissected after 6 h in *Mfsd2a Cre<sup>ERT2</sup> mTmG* mice. (K) 100  $\mu$ g Tx was injected at P4 and dissected after 400 h (P21) (L) 2 mg/kg Tx was injected in P20 *Mfsd2a Cre<sup>ERT2</sup> mTmG* mice and dissect at P21. Yellow arrows indicate tip cells and red arrows indicate location of GFP-expressing ECs in arteries. (M) Quantification of *Mfsd2a Cre<sup>ERT2</sup> mTmG* GFP expressing vessel length over IB4 positive vessel length from optic nerve. n = 6-8 retinas per time point. P-value < 0.001, Error bars: SEM. \*P-value < 0.05, \*\*P-value < 0.01, \*\*\*P-value < 0.001, ns: nonsignificant, One-way ANOVA. ON: optic nerve, V: vein, A: artery, Scale bars: 500  $\mu$ m (A-K) and 50  $\mu$ m (L).

**Figure 2**

**A** bioRxiv preprint doi: <https://doi.org/10.1101/2021.05.06.442985>; this version posted May 6, 2021. The copyright holder for this preprint (which was not certified by peer review) is the author/funder. All rights reserved. No reuse allowed without permission.

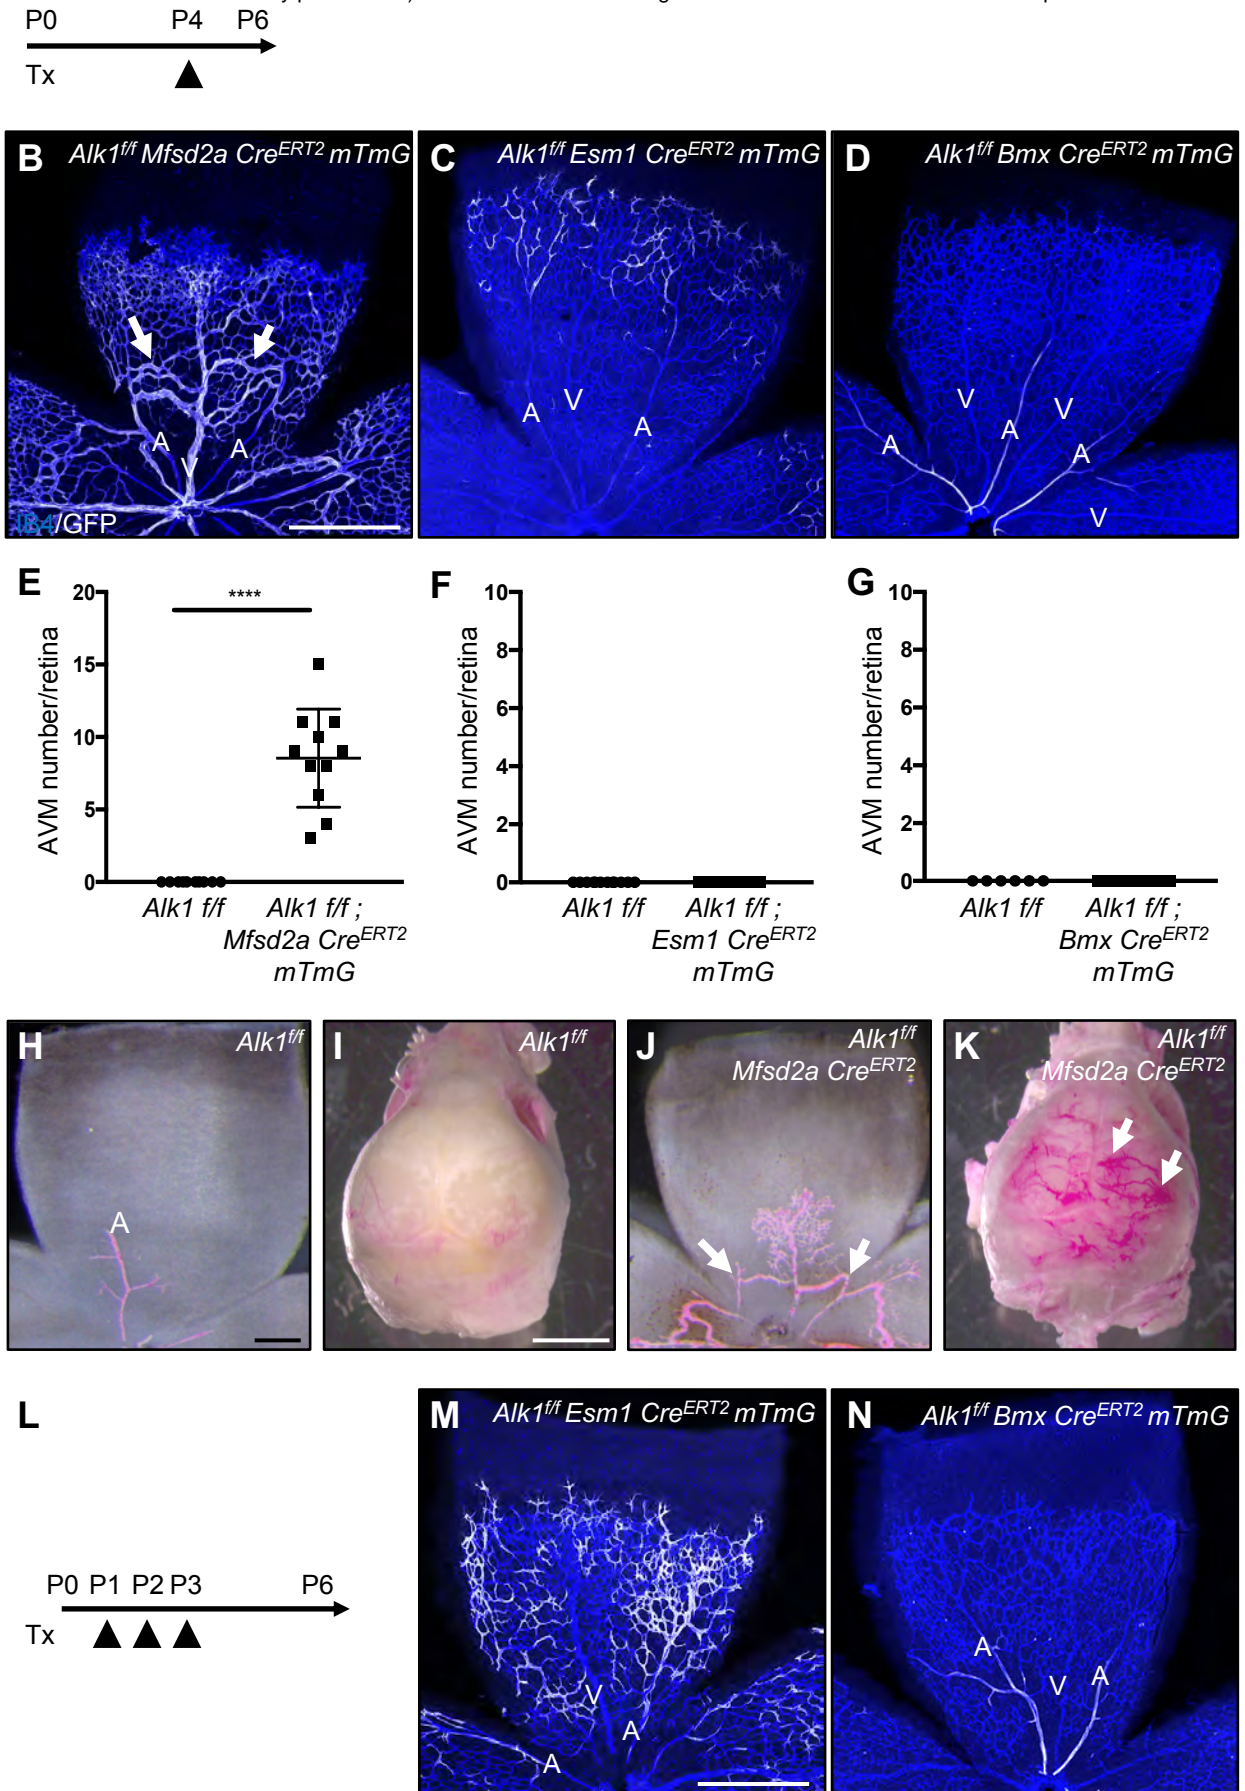

## Figure 2. Capillary-venous loss of ALK1 leads to retinal and brain AVMs.

bioRxiv preprint doi: <https://doi.org/10.1101/2021.05.06.442985>; this version posted May 6, 2021. The copyright holder for this preprint (which was not certified by peer review) is the author/funder. All rights reserved. No reuse allowed without permission.

(A) Schematic representation of the experimental strategy used to delete *Alk1* in mice (P4-P6). (B-D) P6 retina flat mount images labeled with IB4 (blue) and GFP (white) from *Alk1<sup>ff</sup> Mfsd2a Cre<sup>ERT2</sup> mTmG* (B), *Alk1<sup>ff</sup> Esm1 Cre<sup>ERT2</sup> mTmG* (C) and *Alk1<sup>ff</sup> Bmx Cre<sup>ERT2</sup> mTmG* pups (D) injected with 100  $\mu$ g Tx at P4 and dissected at P6. White arrows indicate AVMs. (E-G) Quantification of AVM number. n = 6-11 mice per group. Error bars: SEM. \*\*\*\* P-value < 0.0001, two-tailed unpaired t-test. (H-K) Vascular labeling with latex dye (red) of retinal and brain vessels in *Alk1<sup>ff</sup>* (H and I) and *Alk1<sup>ff</sup> Mfsd2a Cre<sup>ERT2</sup>* (J and K) P6 pups. White arrows indicate AVMs. (L) Schematic representation of the experimental strategy used to delete *Alk1* in mice (P1-P6). Arrowheads indicate injection of 100  $\mu$ g Tx at P1, P2 and P3 in *Alk1<sup>ff</sup> Esm1* and *Bmx Cre<sup>ERT2</sup> mTmG* pups. (M and N) IB4 (blue) and GFP (white) staining of retinal flat mount from *Alk1<sup>ff</sup> Esm1 Cre<sup>ERT2</sup> mTmG* (M) and *Alk1<sup>ff</sup> Bmx Cre<sup>ERT2</sup> mTmG* (N). Scale bars: 500  $\mu$ m (B-D, M-N), 200  $\mu$ m (H and J), 2 mm (I and K).

**Figure 3**

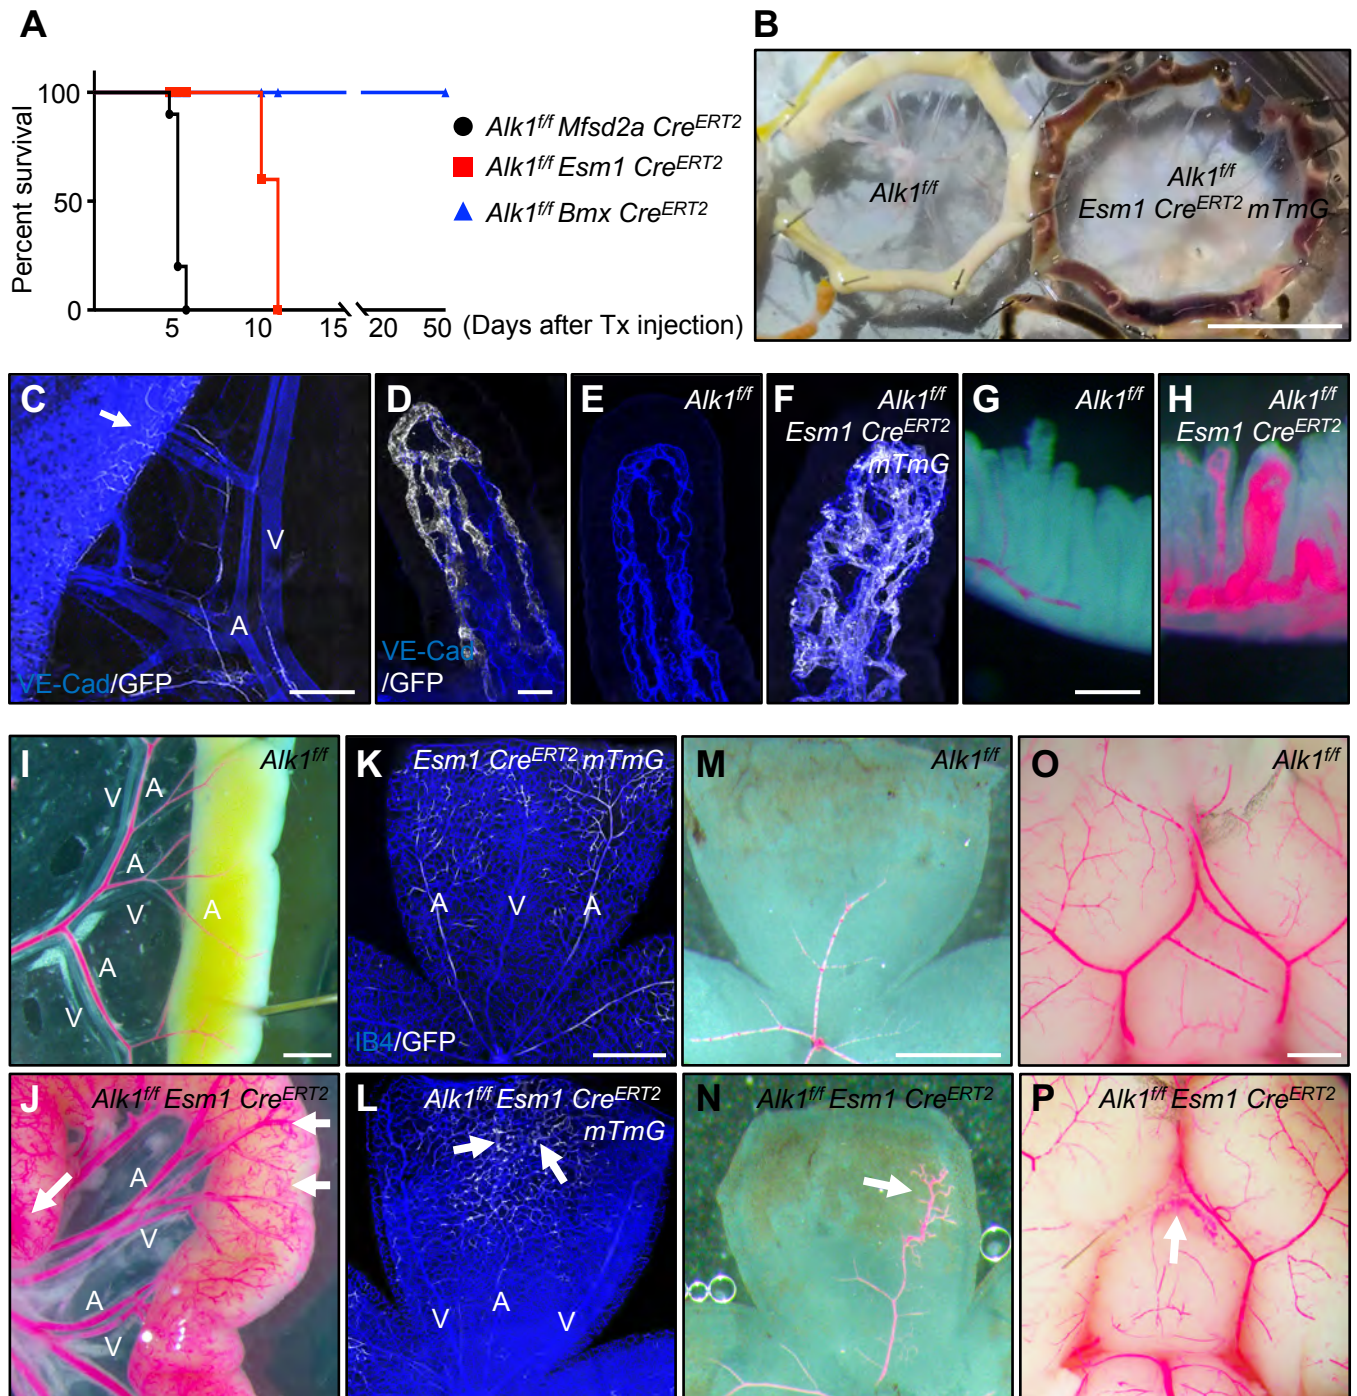

### Figure 3. *Alk1<sup>ff</sup> Esm1 Cre<sup>ERT2</sup> mTmG* mice display vascular malformations.

bioRxiv preprint doi: <https://doi.org/10.1101/2021.05.06.442985>; this version posted May 6, 2021. The copyright holder for this preprint (which was not certified by peer review) is the author/funder. All rights reserved. No reuse allowed without permission.

(A) Survival curves for *Alk1<sup>ff</sup> Mfsd2aCre<sup>ERT2</sup>*, *Alk1<sup>ff</sup> Esm1Cre<sup>ERT2</sup>* and *Alk1<sup>ff</sup> BmxCre<sup>ERT2</sup>*

mice injected with 100  $\mu$ g Tx at P4. n = 8-10 mice/group. (B) Freshly dissected small intestines from P14 mice with the indicated genotypes after 100  $\mu$ g Tx injection at P4. *Alk1<sup>ff</sup> Esm1 Cre<sup>ERT2</sup> mTmG* mice displayed intestinal hemorrhage. (C and D) GFP (white) and VE-Cad (blue) staining of mesentery and gastrointestinal (GI) tract (C) and lacteals (D) from P14 *Esm1 Cre<sup>ERT2</sup> mTmG*. 100  $\mu$ g Tx was injected at P4. An arrow indicates *Esm1* positive capillary ECs (C). (E and F) VE-Cad (blue) and GFP (white) staining of jejunum lacteals from P14 *Alk1<sup>ff</sup>* (E) and *Alk1<sup>ff</sup> Esm1 Cre<sup>ERT2</sup> mTmG* (F). (G-J and M-P) 100  $\mu$ g Tx was injected at P4 and dissected at P12. Vascular labeling with latex dye (red) of villi, GI tracts, retinas and brains in *Alk1<sup>ff</sup>* (G, I, M and O) and *Alk1<sup>ff</sup> Esm1 Cre<sup>ERT2</sup>* (H, J, N and P) P12 pups. (K and L) 100  $\mu$ g Tx was injected at P4 and dissected at P12 (K and L). IB4 (blue) and GFP (white) staining of retinal flat mounts from *Esm1 Cre<sup>ERT2</sup> mTmG* (K) and *Alk1<sup>ff</sup> Esm1 Cre<sup>ERT2</sup> mTmG* (L) P12 mice. An arrow indicates vascular malformations (J, L and N). A: artery, V: vein, Scale bars: 1 cm (B), 400  $\mu$ m (C), 1 mm (I-J and M-P), 500  $\mu$ m (K-N), 200  $\mu$ m (G and H), 25  $\mu$ m (D-F).

Figure 4

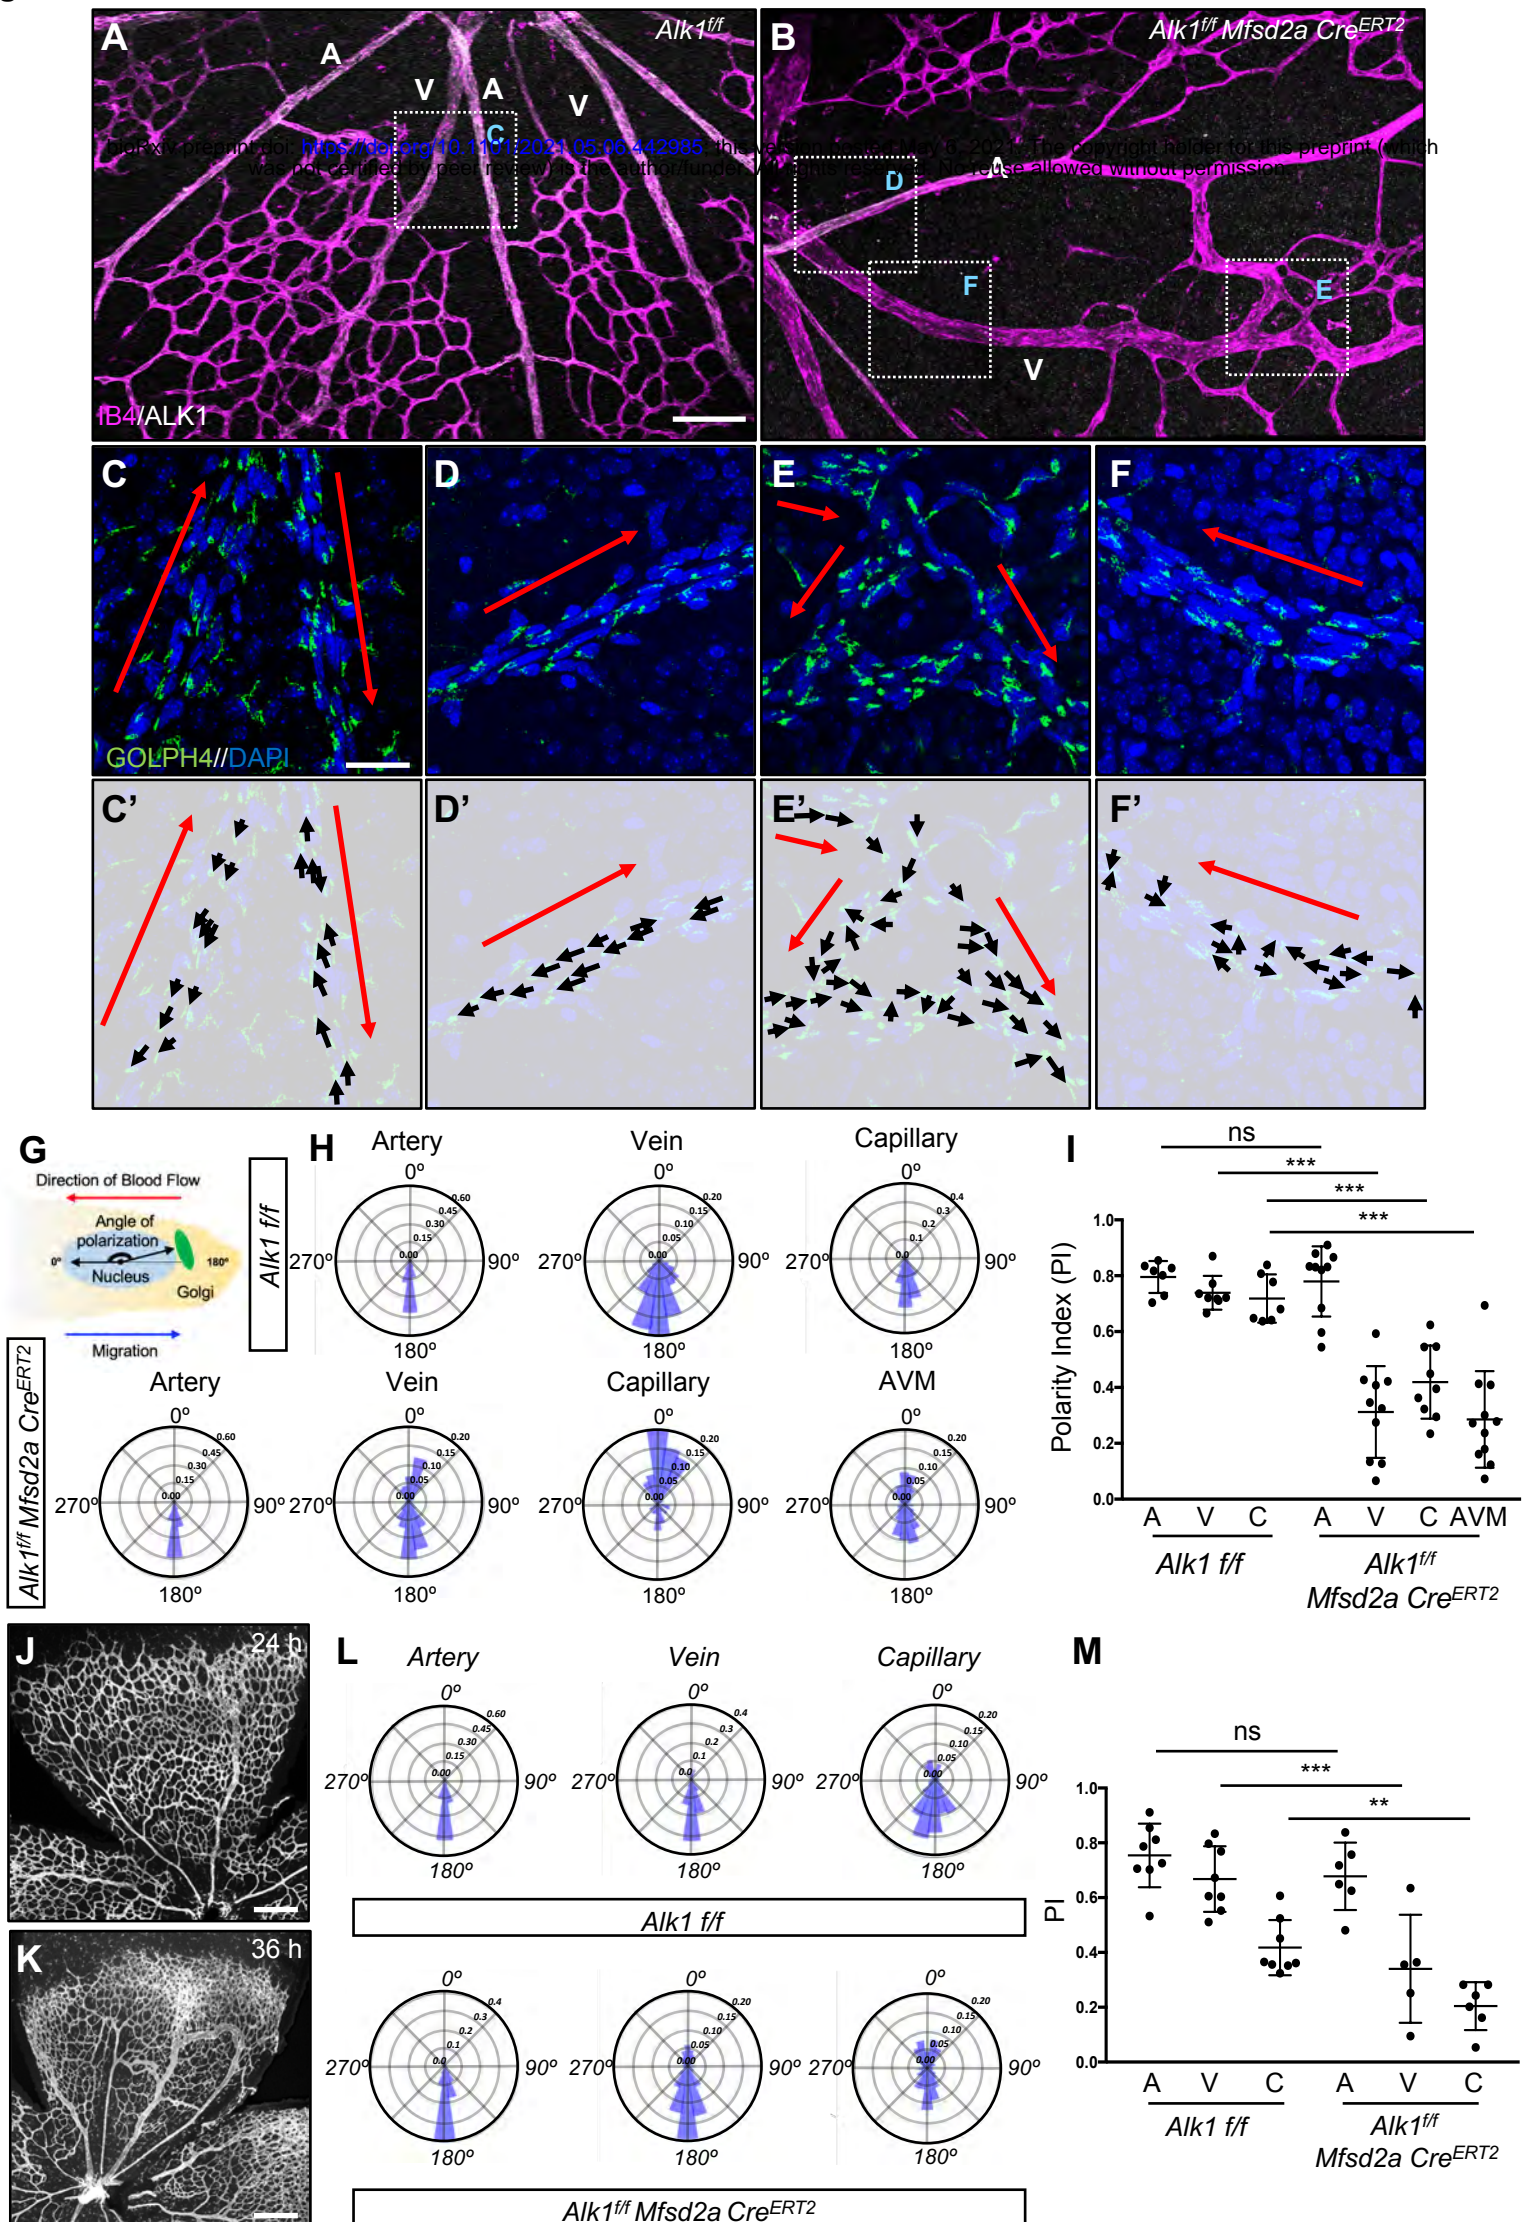



#### Figure 4. ALK1 controls cell polarization against the blood flow direction.

bioRxiv preprint doi: <https://doi.org/10.1101/2021.05.06.442985>; this version posted May 6, 2021. The copyright holder for this preprint (which was not certified by peer review) is the author/funder, who has granted bioRxiv a license to display the preprint in perpetuity. It is made available under aCC-BY-NC-ND 4.0 International license.

(A-B) IB4 (magenta) and ALK1 (white) staining of retinal flat mounts from *Alk1<sup>ff</sup>* (A) and *Alk1<sup>ff</sup> Mfsd2a Cre<sup>ERT2</sup>* (B) pups injected with 100 µg Tx at P4 and dissected at P6. (C-F) Higher magnification of insets in A and B. GOLPH4 (green) and DAPI (blue) staining of retina flat mounts. Red arrows indicate the blood flow direction. (C'-F') Background images from Figure 2 C-F and corresponding polarity vectors (black arrows). (G) The polarity axis of each cell was defined as the angle between the direction of blood flow and the cell polarity axis, defined by a vector drawn from the center of the cell nucleus to the center of the Golgi apparatus. (H) Angular histograms showing the distribution of polarization angles of ECs in the artery, vein and capillaries from *Alk1<sup>ff</sup>* and artery, vein, capillary and AVM from *Alk1<sup>ff</sup> Mfsd2a Cre<sup>ERT2</sup>* mouse retinas. n = 7-11 retinas. (I) PI box plots of ECs from artery, vein and capillary from *Alk1<sup>ff</sup>* and artery, vein, capillary and AVM from *Alk1<sup>ff</sup> Mfsd2a Cre<sup>ERT2</sup>* P6 retinas. n = 7-11 retinas. (J and K) IB4 (gray) staining of retinal flat mounts from *Alk1<sup>ff</sup> Mfsd2a Cre<sup>ERT2</sup>* pups injected with 100 µg at P4 and dissected after 24 h (P5) (J) and 36 h (P5.5) (K). (L) Angular histograms showing the distribution of polarization angles of ECs in the artery, vein and capillary from *Alk1<sup>ff</sup>* and *Alk1<sup>ff</sup> Mfsd2a Cre<sup>ERT2</sup>* P5 retinas at 24 h after Tx injection. (M) PI box plots of ECs from artery, vein and capillary from *Alk1<sup>ff</sup>* and *Alk1<sup>ff</sup> Mfsd2a Cre<sup>ERT2</sup>* retinas at 24 h after Tx injection. n = 5-8 retinas/group. Error bars: SEM. \*\*P-value < 0.01, \*\*\*P-value < 0.001, ns: nonsignificant, two-tailed unpaired t-test. Scale bars: 100 µm (A-B), 20 µm (C-F) and 500 µm (J-K)

**Figure 5**

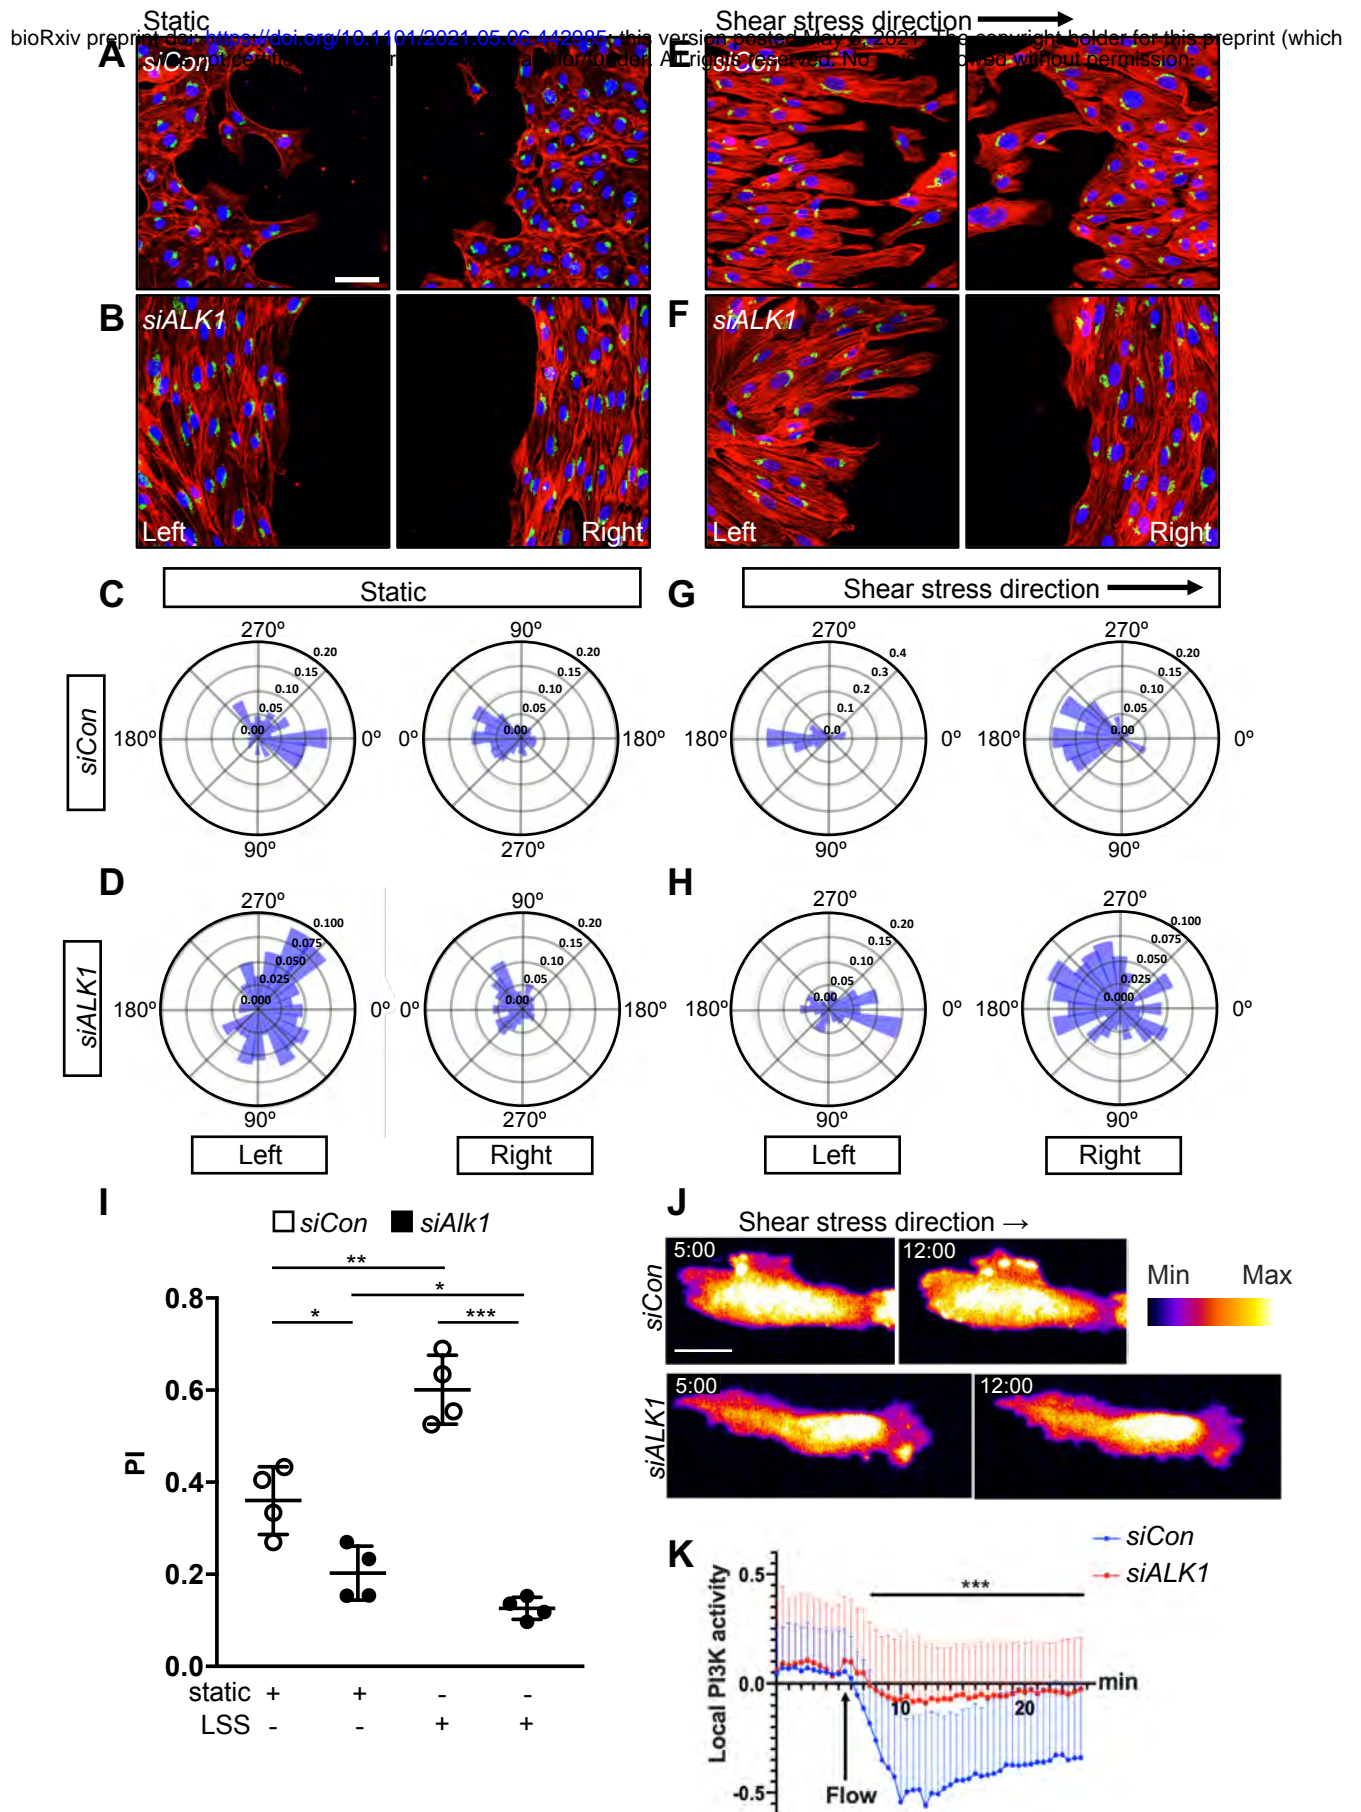

## Figure 5. ALK1 controls EC polarization against the flow direction *in vitro*.

bioRxiv preprint doi: <https://doi.org/10.1101/2021.05.06.442985>; this version posted May 6, 2021. The copyright holder for this preprint (which was not certified by peer review) is the author/funder. All rights reserved. No reuse allowed without permission.

(A-B) Representative images of wound-healing assays after 18 h showing polarity angles of HUVECs transfected with Control (*siCon*) (A) or *ALK1* (*siALK1*) (B) siRNAs under static conditions and immunolabeled with phalloidin (red), GM130 (green), and DAPI (blue). (E-F) Representative images of wound-healing assays showing polarity angles of *siCon* (E) or *siALK1* (F) HUVECs with 18 h exposure to laminar shear stress (LSS) at 15 dynes/cm<sup>2</sup>. Left panels are upstream and right panels are downstream of flow. (C-D and G-H) Angular histograms showing polarization angles of *siCon* (C and G) or *siALK1* ECs (D and H) at 18 h after scratch with (G-H) or without (C-D) LSS. Left is upstream and right is downstream of flow (G and H). (I) PI box plots of upstream (left) scratch areas from *siCon* or *siALK1* transfected HUVECs at 18 h after with or without LSS. (C-I) n=6-8 images from 3 independent experiments. Error bars: SEM. \*P-value < 0.05, \*\*P-value < 0.01, \*\*\*P-value < 0.001, two-tailed unpaired t-test. (J) Representative time lapse images of *siCon* or *siALK1* HUVECs stably transduced with PH-AKT-mClover3 and plasma membrane targeting sequence of LCK-mRuby3. HUVEC monolayers in microfluidic chambers were exposed to 12 dynes/cm<sup>2</sup> LSS under the microscope. 5 min (static) and 12 min (LSS) images were selected from the movies. The surface is color-coded by the value of PH-AKT intensity. (K) Local activation of PI3K was quantified by image analysis. PH-AKT intensity was normalized with average static intensity at each time point. 0 - 5 min : static and 5 - 24.5 min : LSS, n= 61, 41 cells from 3 independent experiments, Error bar : SEM. \*\*\*P-value < 0.001, two-tailed unpaired t-test. Scale bars : 50 μm (A-B and E-F), 20 μm (J).

**Figure 6**

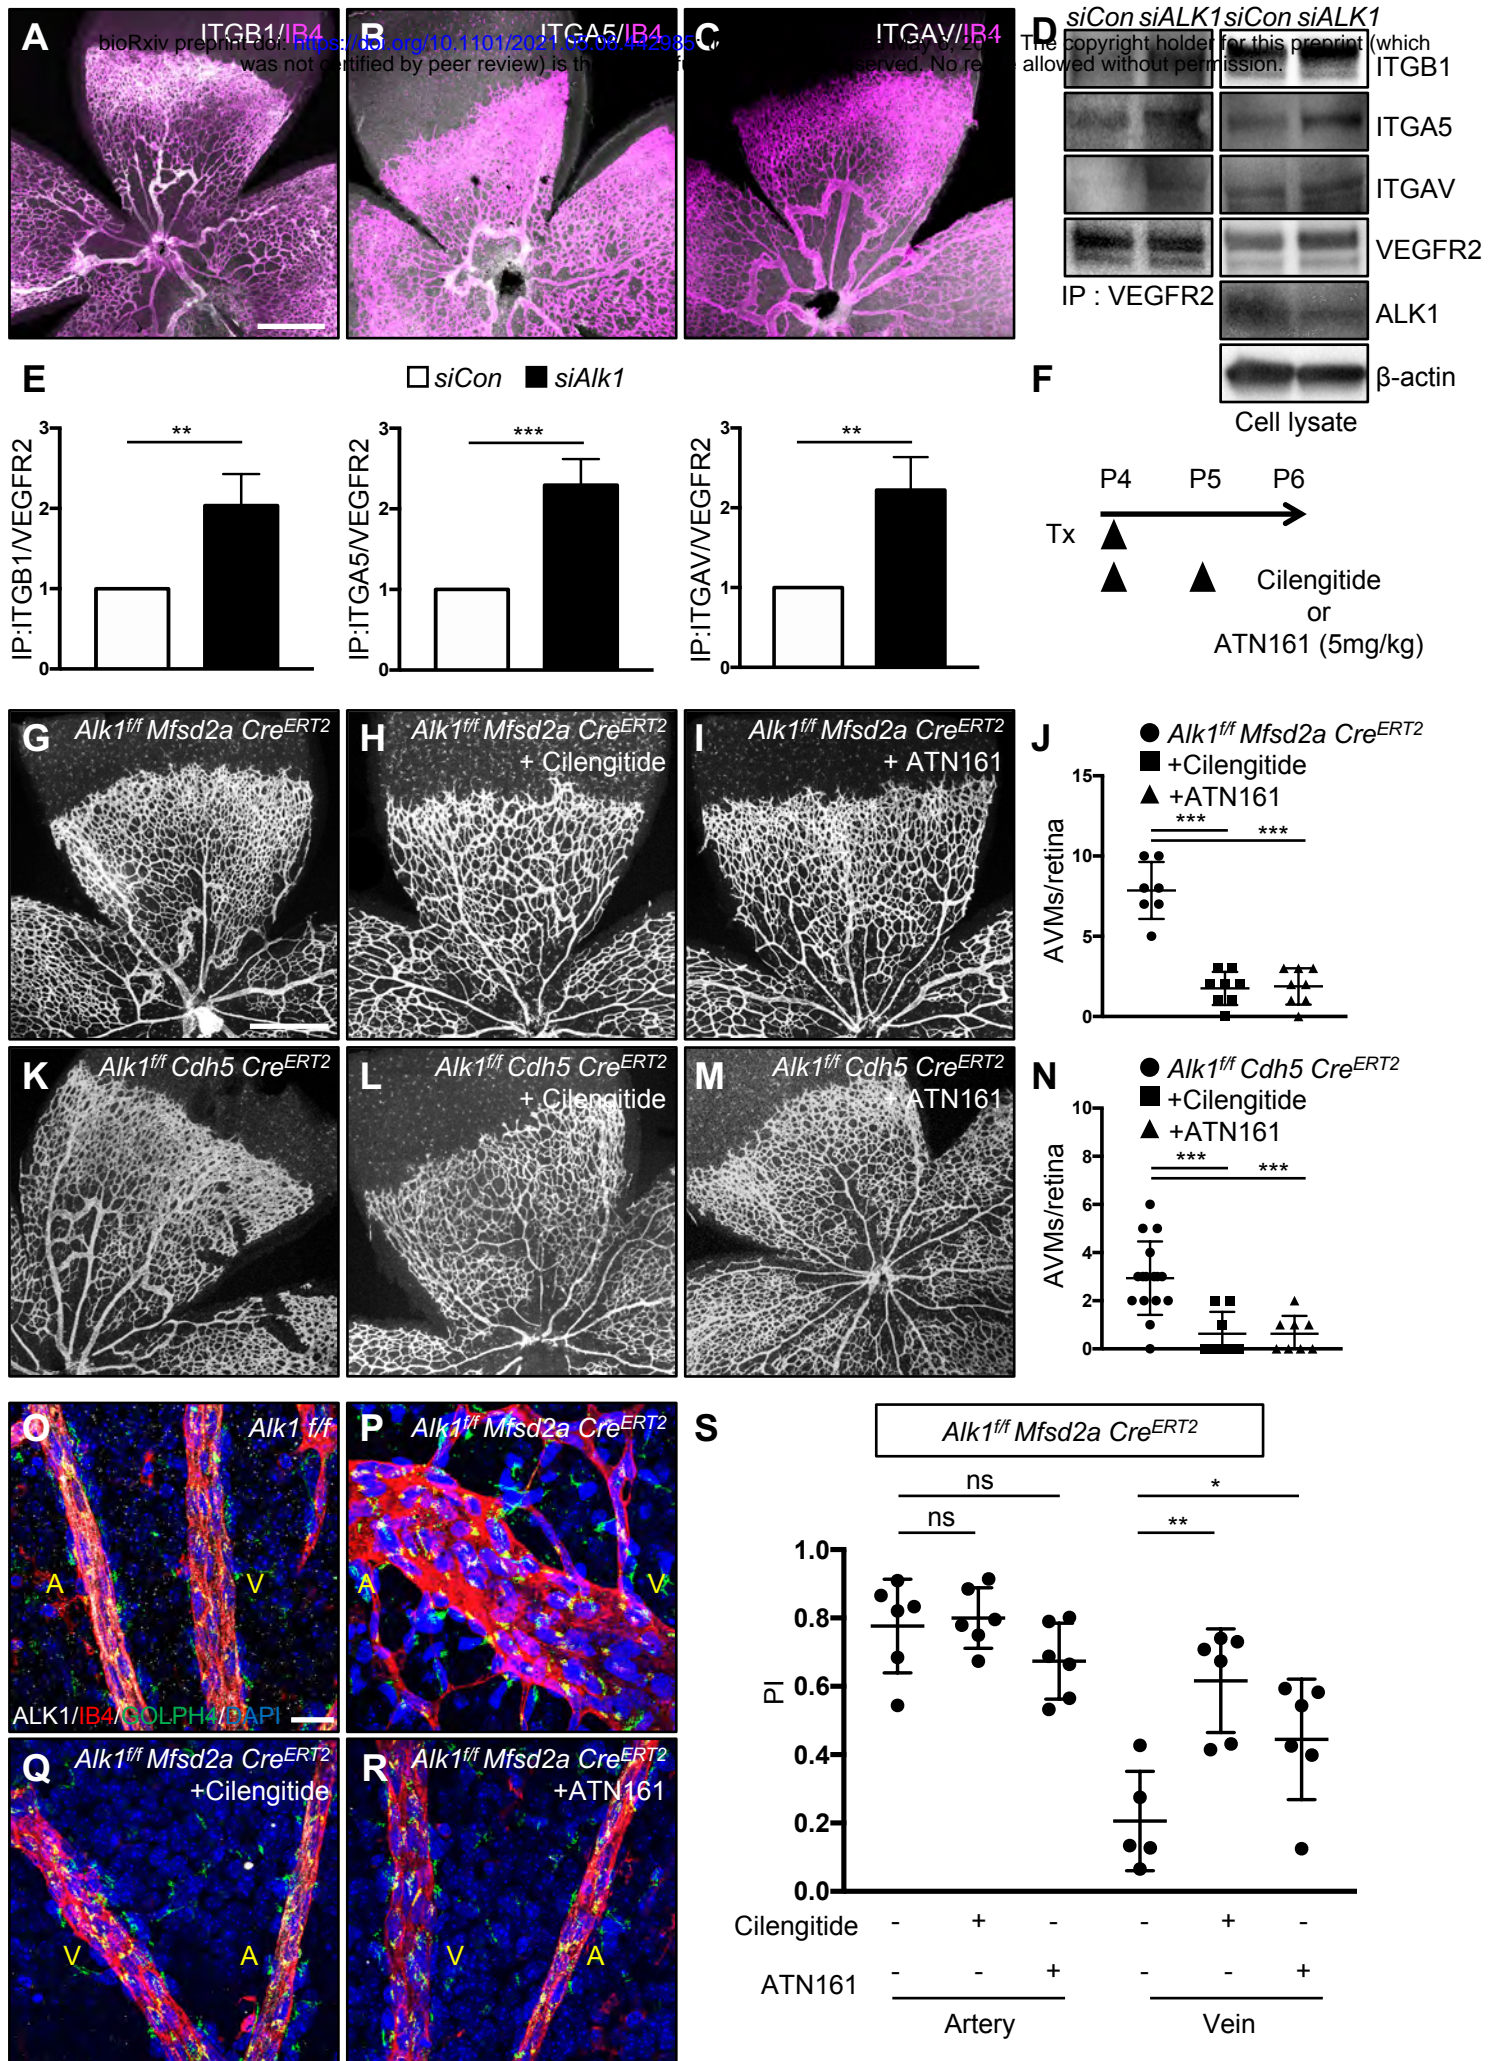

## Figure 6. Integrin inhibition prevents AVM formation in *Alk1* mutant retinas.

bioRxiv preprint doi: <https://doi.org/10.1101/2021.05.06.442985>; this version posted May 6, 2021. The copyright holder for this preprint (which was not certified by peer review) is the author/funder. All rights reserved. No reuse allowed without permission.

(A-C) IB4 (Magenta) and ITGB1 (A, white), ITGA5 (B, white) or ITGAV (C, white) staining of retinal flat mounts from P8 *Alk1<sup>ff</sup> Mfsd2a Cre<sup>ERT2</sup>* pups. (D) VEGFR2 immunoprecipitation in *siCon* or *siALK1* HUVECs and western blot analysis for ITGB1, ITGA5 and ITGAV. VEGFR2, ITGB1, ITGA5, ITGAV, ALK1 and  $\beta$ -actin expression from the total cell lysates are shown as loading controls. (E) Quantification of ITGB1, ITGA5 or ITGAV levels normalized to VEGFR2 from immunoprecipitation. \*\*P<0.01, \*\*\*P-value < 0.001, two-tailed unpaired t-test. (F) Experimental strategy to assess the effects of integrin inhibitors in *Alk1* deleted retinas. Arrowheads indicate the time course of Tx (100  $\mu$ g) and Cilengitide (5mg/kg), ATN161 (5mg/kg) or vehicle administration. (G-I and K-M) IB4 staining of P6 retinal flat mounts from *Alk1<sup>ff</sup> Mfsd2a Cre<sup>ERT2</sup>* (G-I) or *Alk1<sup>ff</sup> CDH5 Cre<sup>ERT2</sup>* (K-M) injected with Cilengitide (H and L) or ATN161 (I and M) at P4 and P5. (J and N) Quantification of the AVM number. Each dot represents one retina. n = 7-16 retinas per group. Error bars: SEM. \*\*\*P-value < 0.001, One-way ANOVA with Holm-Sidak test. (O-R) IB4 (Magenta), Alk1 (white), GOLPH4 (green) and DAPI (blue) staining of retina flat mounts from *Alk1<sup>ff</sup>* (O), *Alk1<sup>ff</sup> Mfsd2a Cre<sup>ERT2</sup>* (P), Cilengitide (Q) or ATN161 (R) injected *Alk1<sup>ff</sup> Mfsd2a Cre<sup>ERT2</sup>* pups. A: artery, V: vein, (S) PI box plots of ECs from artery and vein from *Alk1<sup>ff</sup>*, *Alk1<sup>ff</sup> Mfsd2a Cre<sup>ERT2</sup>*, Cilengitide or ATN161 injected *Alk1<sup>ff</sup> Mfsd2a Cre<sup>ERT2</sup>* retinas. n=5-8 retinas/group. Error bars: SEM. \*P-value < 0.05, \*\*P-value < 0.01, ns: nonsignificant, One-way ANOVA with Holm-Sidak test. Scale bars: 500  $\mu$ m (A-C, G-I and K-M), 20  $\mu$ m (O-R).

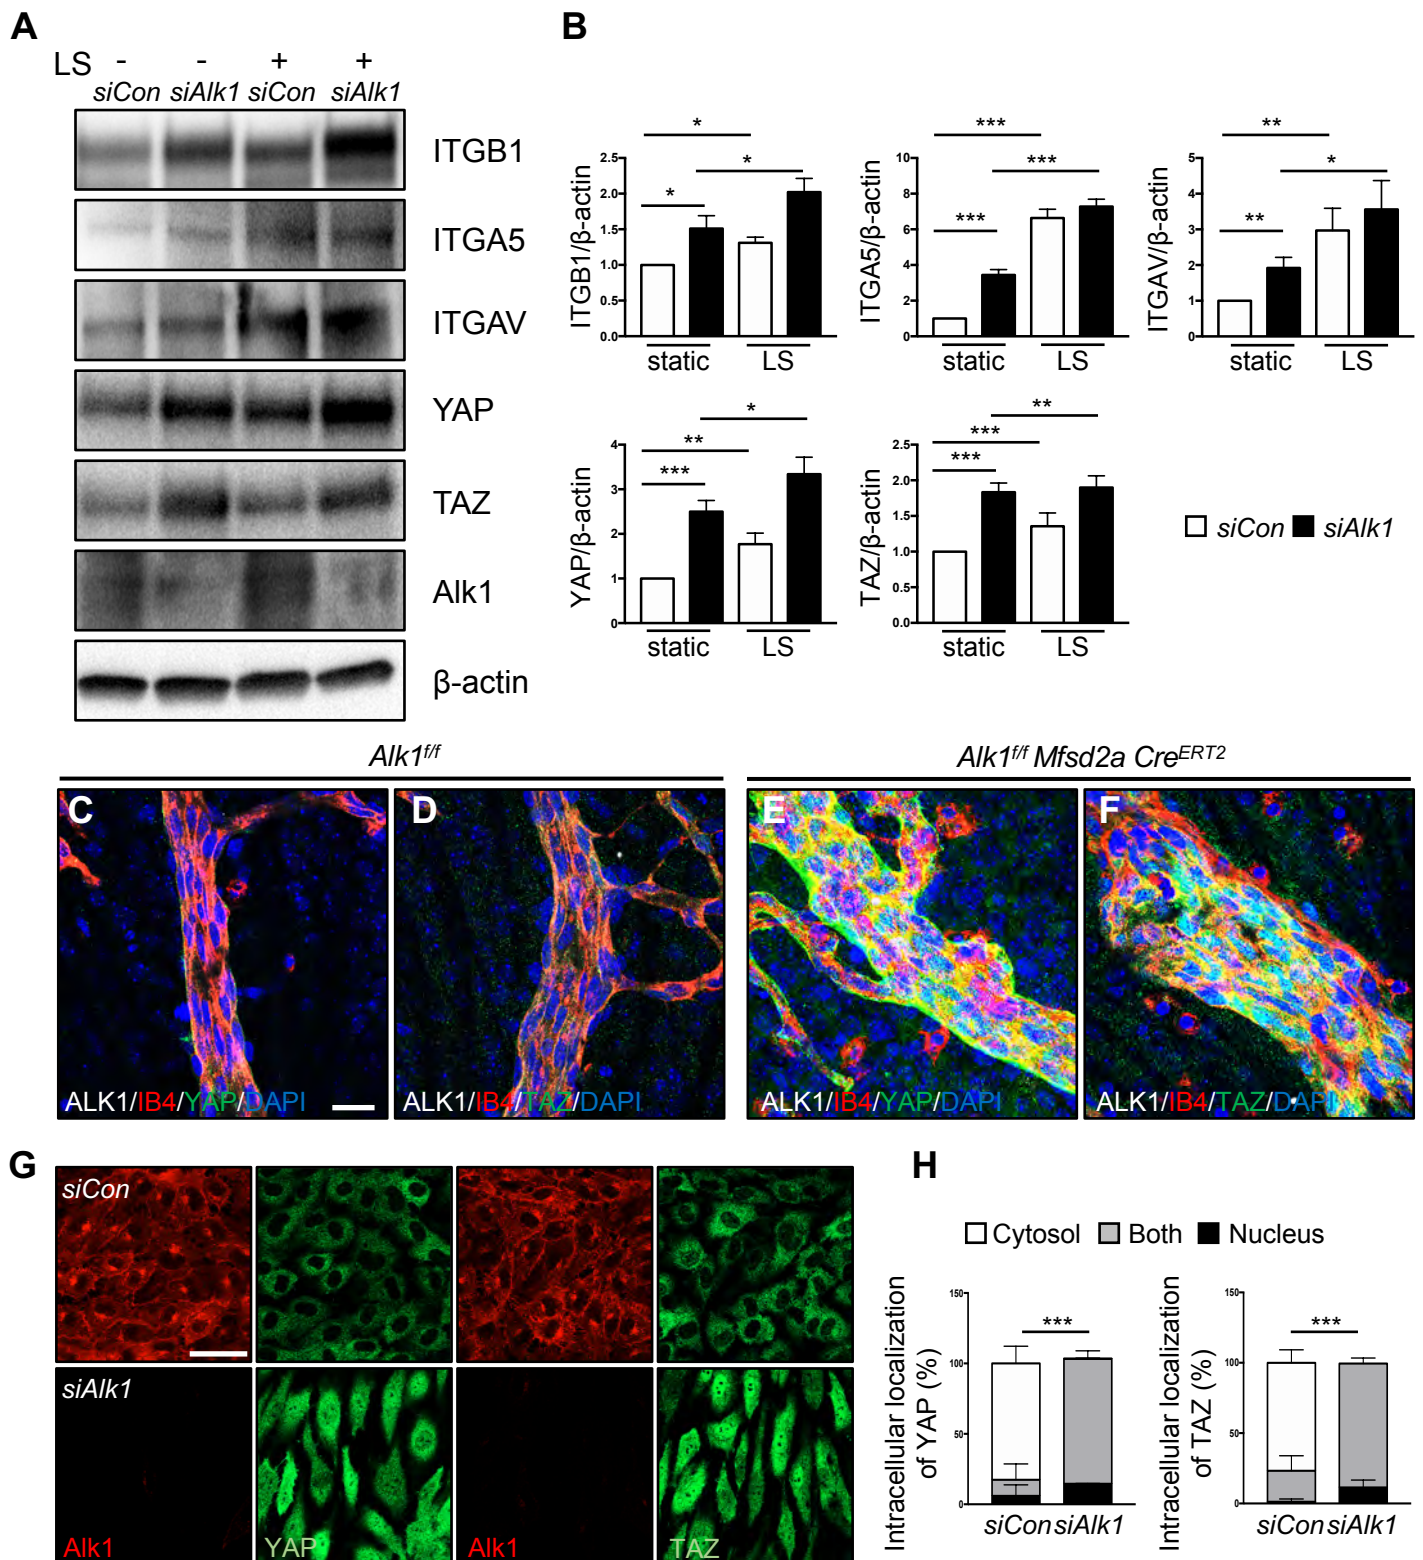

## Figure 7. ALK1 controls YAP/TAZ expression and localization.

bioRxiv preprint doi: <https://doi.org/10.1101/2021.05.06.442985>; this version posted May 6, 2021. The copyright holder for this preprint (which was not certified by peer review) is the author/funder. All rights reserved. No reuse allowed without permission.

(A) Western blot analysis of HUVECs transfected with control and ALK1 siRNAs followed by 18 h exposure to LSS (15 dynes/cm<sup>2</sup>). (B) Quantification of ITGB1, ITGA5, ITGAV, YAP or TAZ levels normalized to  $\beta$ -actin. \*P<0.05, \*\*P<0.01, \*\*\*P<0.001, two-tailed unpaired t-test. (C-F) YAP and TAZ (green), ALK1 (gray), IB4 (red), DAPI (blue) staining of retinal flat mounts from P8 Alk1<sup>fl/fl</sup> (C-D) or Alk1<sup>fl/fl</sup> Mfsd2aCre<sup>ERT2</sup> (E-F) pups. A scale bar: 20  $\mu$ m (A-F) (G) YAP or TAZ (green) and Alk1 (red) staining of *siCon* and *siALK1* HUVECs. A scale bar: 50  $\mu$ m. (H) Quantification of YAP and TAZ localization from *siCon* and *siALK1* transfected HUVECs. \*\*\*P<0.001, n = 3 independent experiments. Multiple comparisons with Holm-Sidak test.

**Figure 8**

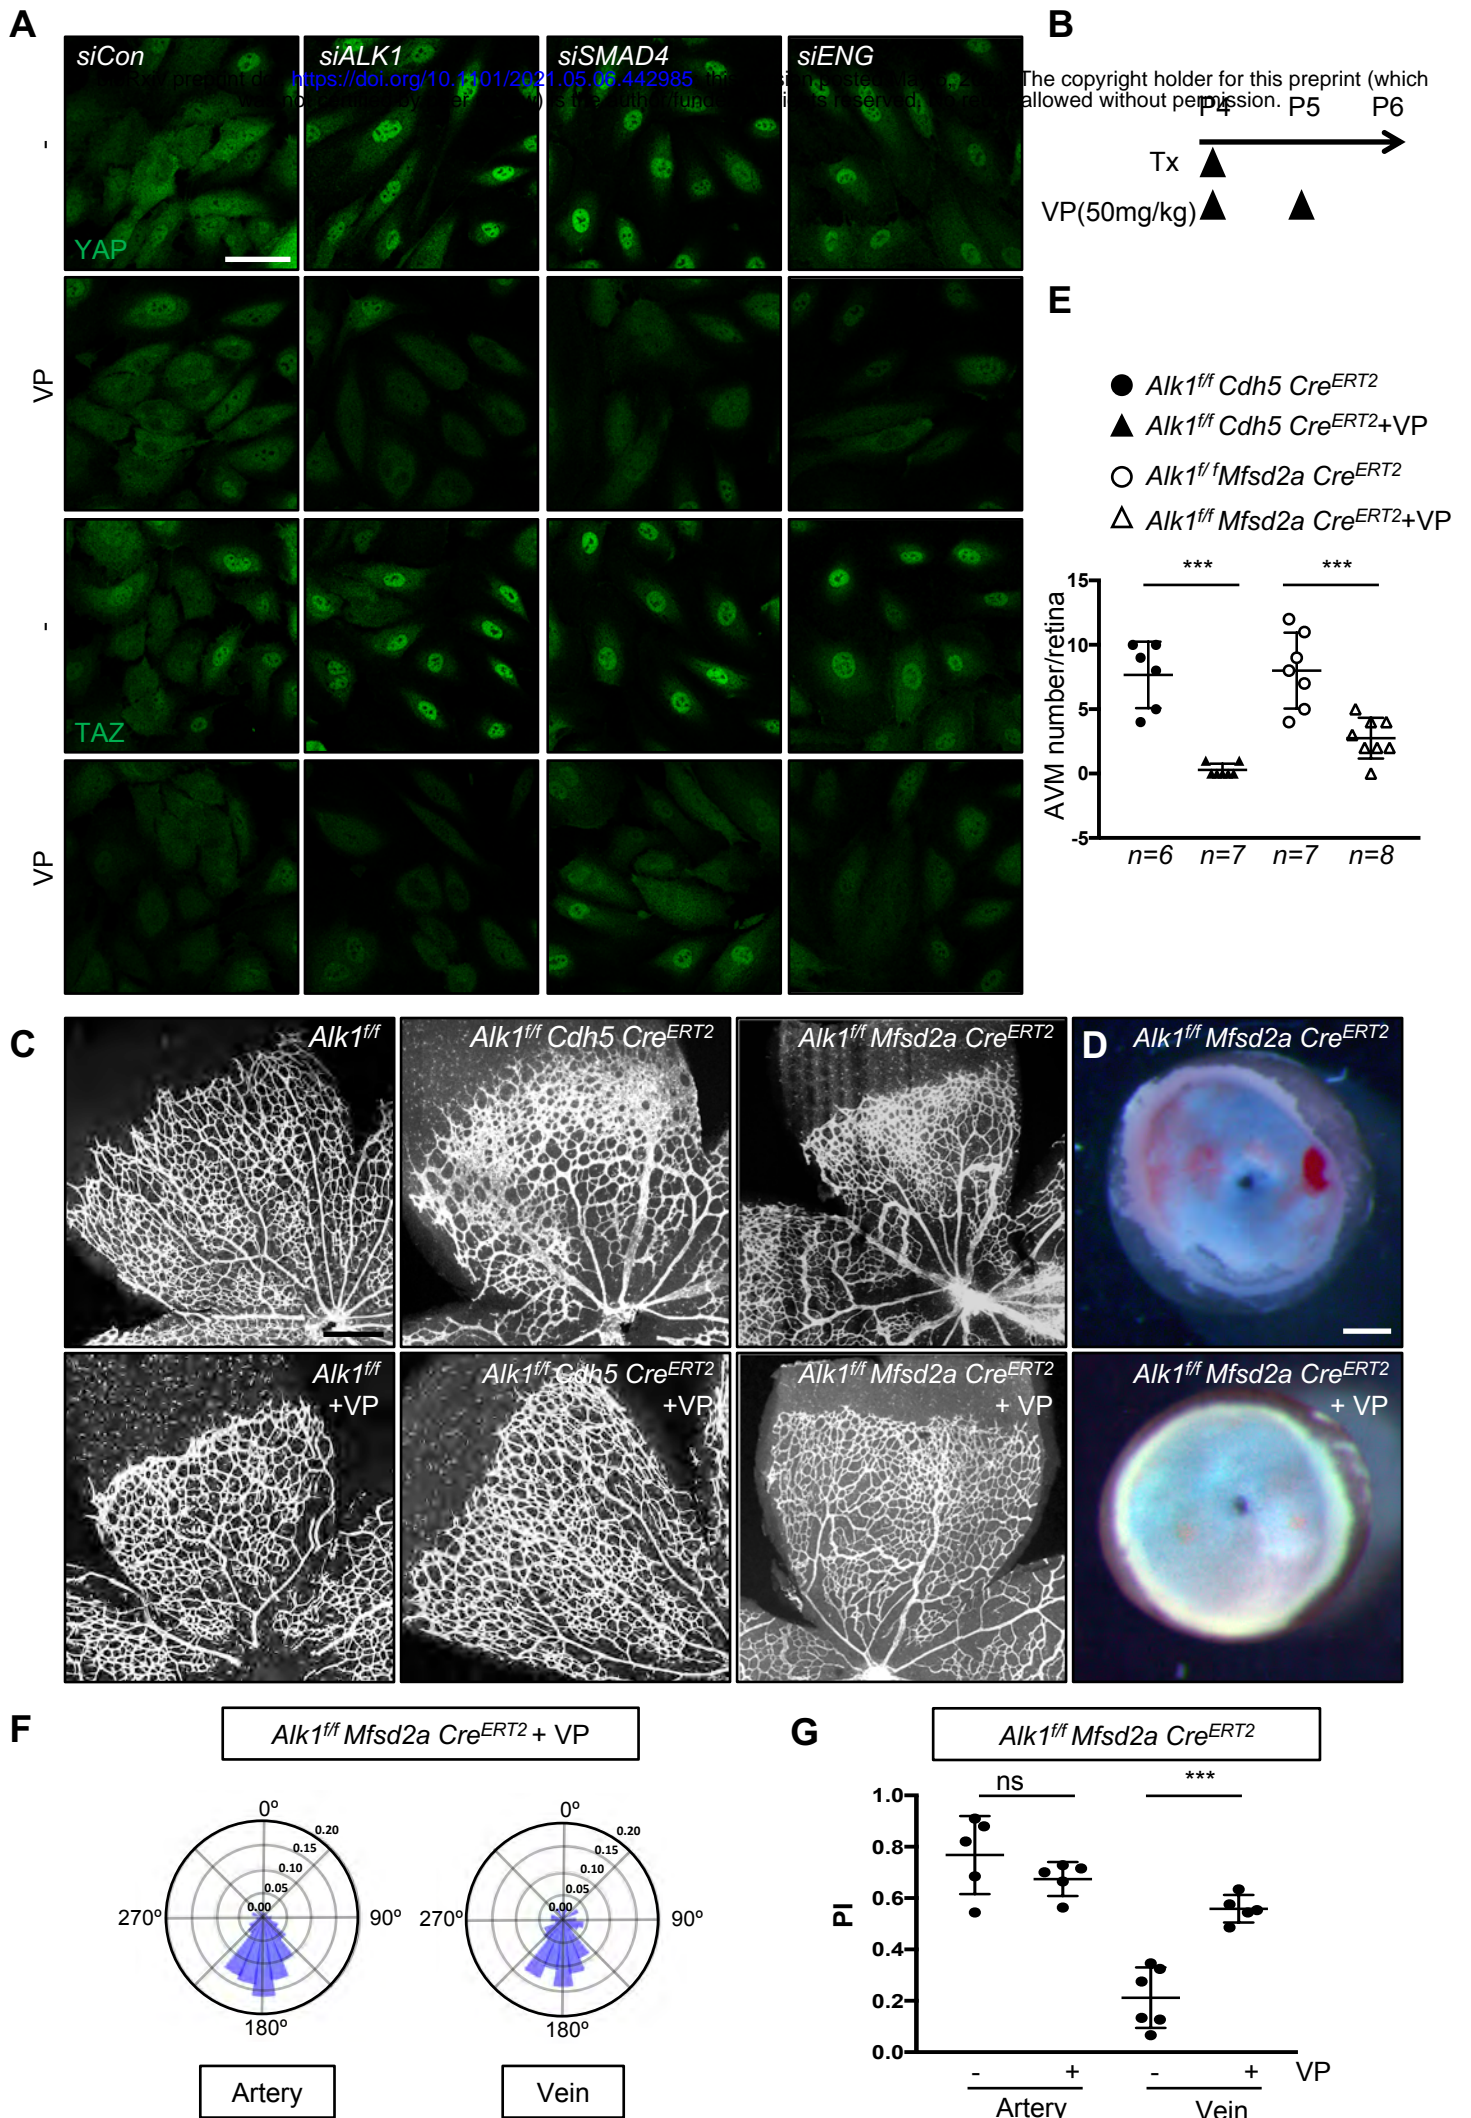



## Figure 8. YAP/TAZ inhibition improves AVM formation in *Alk1* mutant retinas.

bioRxiv preprint doi: <https://doi.org/10.1101/2021.05.06.442985>; this version posted May 6, 2021. The copyright holder for this preprint (which was not certified by peer review) is the author/funder. All rights reserved. No reuse allowed without permission.

(A) YAP and TAZ staining of *siCon*, *ALK1*, *SMAD4* or *ENG* siRNAs transfected HUVECs treated with DMSO or Verteporfin (VP, 5  $\mu$ M) for 6 h. Nuclear YAP/TAZ localization in *siALK1*, *siSMAD4* or *siENG* ECs is blocked by VP treatment. A scale bar: 50  $\mu$ m. (B) Experimental strategy to assess the effects of YAP/TAZ inhibition in EC specific *Alk1* deleted vasculature. Arrowheads indicate the time course of Tx (100  $\mu$ g) and VP (50mg/kg) or vehicle administration. (C) IB4 staining of P6 retinal flat mounts from VP injected *Alk1<sup>ff</sup>*, *Alk1<sup>ff</sup> CDH5 Cre<sup>ERT2</sup>* or *Alk1<sup>ff</sup> Mfsd2a Cre<sup>ERT2</sup>* mice. (D) Stereomicroscopy images of vehicle or VP injected *Alk1<sup>ff</sup> Mfsd2a Cre<sup>ERT2</sup>* retinas. (E) Quantification of the AVM number/retina. Each dot represents one retina. n = 6-8 retinas per group. Error bars: SEM. \*\*\*P-value < 0.001, two-tailed unpaired t-test. (F) Angular histograms showing polarization angles of artery and vein from *Alk1<sup>ff</sup> Mfsd2a Cre<sup>ERT2</sup>* with VP. (G) PI box plots of *Alk1<sup>ff</sup> Mfsd2a Cre<sup>ERT2</sup>* with vehicle or VP. n=5-6 retinas, Error bars: SEM, \*\*\*P-value < 0.001, ns: nonsignificant, two-tailed unpaired t-test. Scale bars : 50  $\mu$ m (A), 500  $\mu$ m (C), 300  $\mu$ m (D)

**Figure 9**

**A**

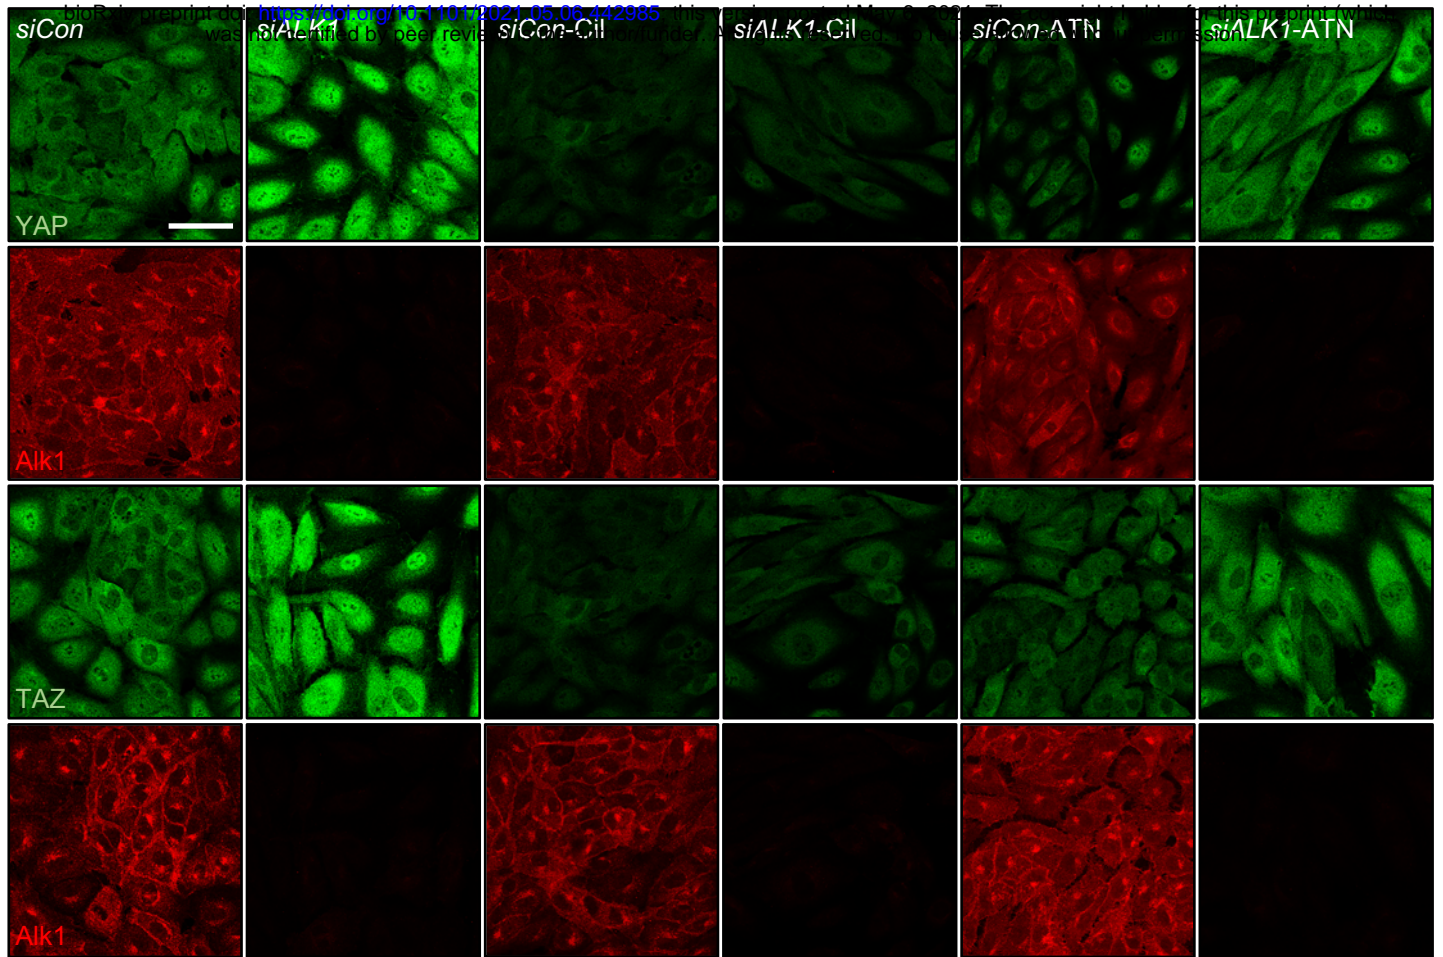

**B**

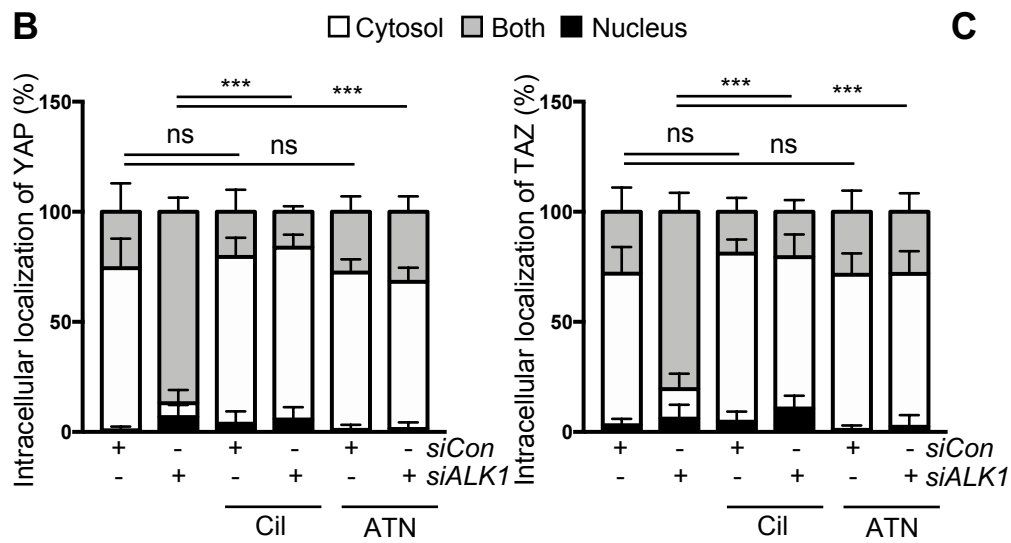

**C**

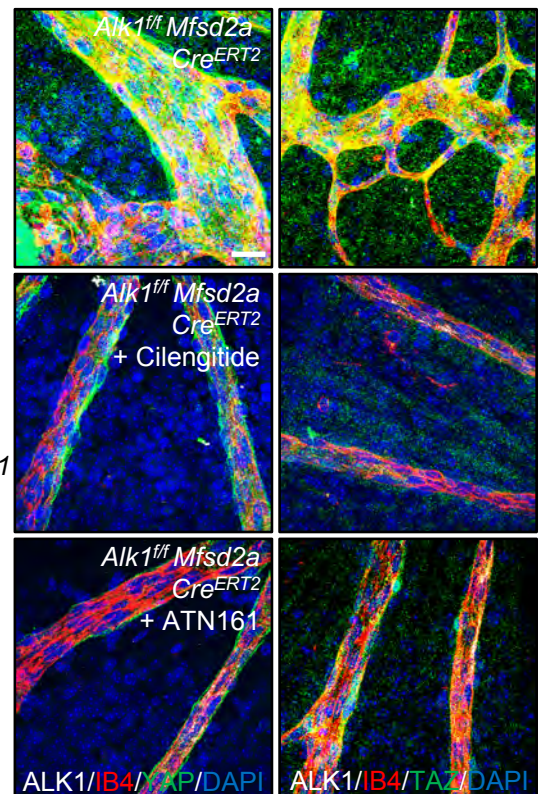

**D**

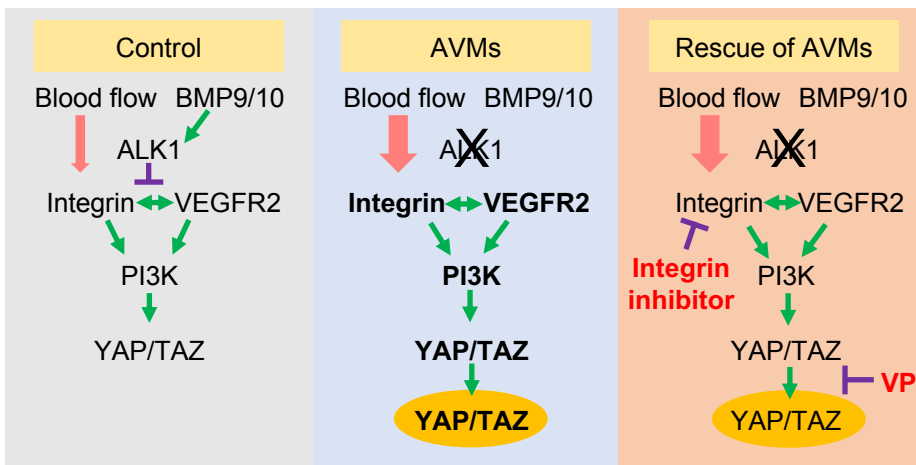

### Figure 9. Integrin acts upstream of YAP/TAZ in an ALK1 dependent manner.

bioRxiv preprint doi: <https://doi.org/10.1101/2021.05.06.442985>; this version posted May 6, 2021. The copyright holder for this preprint (which was not certified by peer review) is the author/funder. All rights reserved. No reuse allowed without permission.

(A) YAP and TAZ staining for control, *ALK1* siRNAs transfected HUVECs treated with PBS, Cilengitide (Cil, 5  $\mu$ M) or ATN161 (ATN, 5  $\mu$ M) for 12 h. Nuclear YAP/TAZ localization in *siALK1* ECs is blocked by Cilengitide and ATN161 treatment. (B) Quantification of YAP and TAZ localization from *siCon* and *siALK1* transfected HUVECs. \*\*\*P<0.001, n = 3 independent experiments. Error bars: SEM. \*\*\*P-value < 0.001, ns: nonsignificant, Multiple comparisons with Holm-Sidak test. (C) YAP and TAZ (green), ALK1 (white), IB4 (red) and DAPI (blue) staining of retinal flat mounts from Cilengitide or ATN161 injected *Alk1<sup>fl/fl</sup> Mfsd2a Cre<sup>ERT2</sup>* P6 mice. (D) A model for ALK1-integrin-YAP/TAZ signaling in maintenance of vascular quiescence. In quiescence, ALK1 signaling represses PI3K activation downstream of integrin-VEGFR2 signaling, through inhibition of YAP/TAZ expression and localization. ALK1 deletion results in increased integrin-VEGFR2 signaling, and consequently in excessive YAP/TAZ expression and localization to the nucleus, thereby inducing vascular defects. Blocking integrin-ECM interaction with integrin inhibitors or YAP/TAZ localization with YAP/TAZ inhibitor rescues vascular malformations in *Alk1* deficient mice. Scale bars: 50  $\mu$ m (A), 20  $\mu$ m (C)

## Supplemental Figure 1

bioRxiv preprint doi: <https://doi.org/10.1101/2021.05.06.442985>; this version posted May 6, 2021. The copyright holder for this preprint (which was not certified by peer review) is the author/funder. All rights reserved. No reuse allowed without permission.

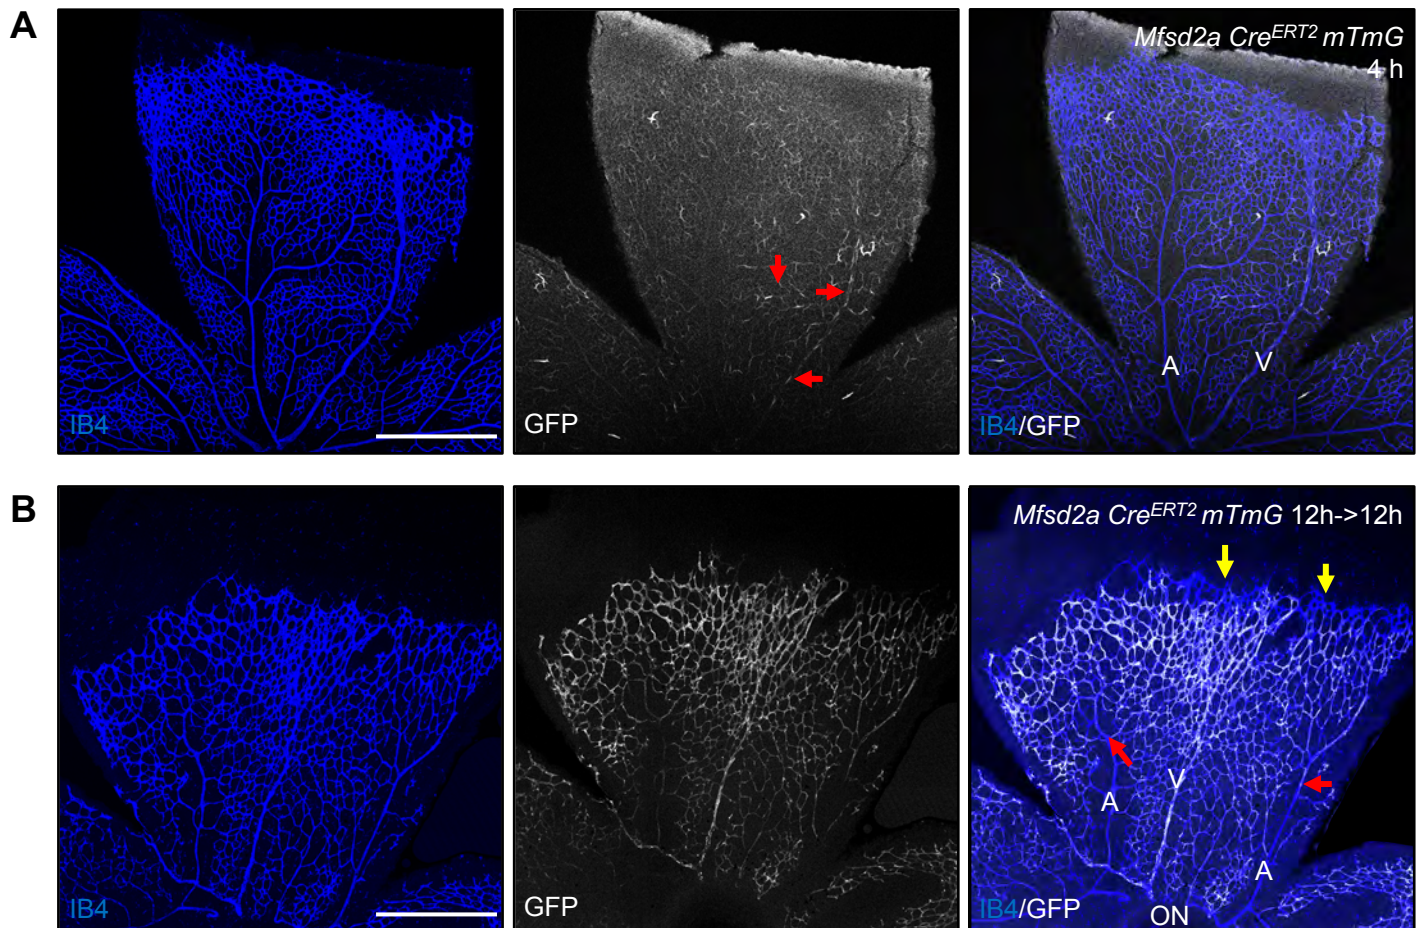

### Supplemental Figure 1. *Mfsd2a* positive cells migrate against the direction of blood flow.

(A) *Mfsd2a* *Cre<sup>ERT2</sup>* *mTmG* mice injected with 100  $\mu$ g Tx at P6 and dissected after 4 h. GFP expressing ECs are located in capillaries and veins (red arrows) but not in arteries. (B) P6 retina flat mount images labeled with IB4 (blue) and GFP (white) from *Mfsd2a* *Cre<sup>ERT2</sup>* *mTmG* mice injected with 100  $\mu$ g Tx at P5, dissected after 12h (P5.5) and cultured for an additional 12 h in vitro (P6). Yellow arrows indicate tip cells and red arrows indicate location of GFP-expressing ECs in arteries. ON: optic nerve, V: vein, A: artery, Scale bar: 500  $\mu$ m

## Supplemental Figure 2

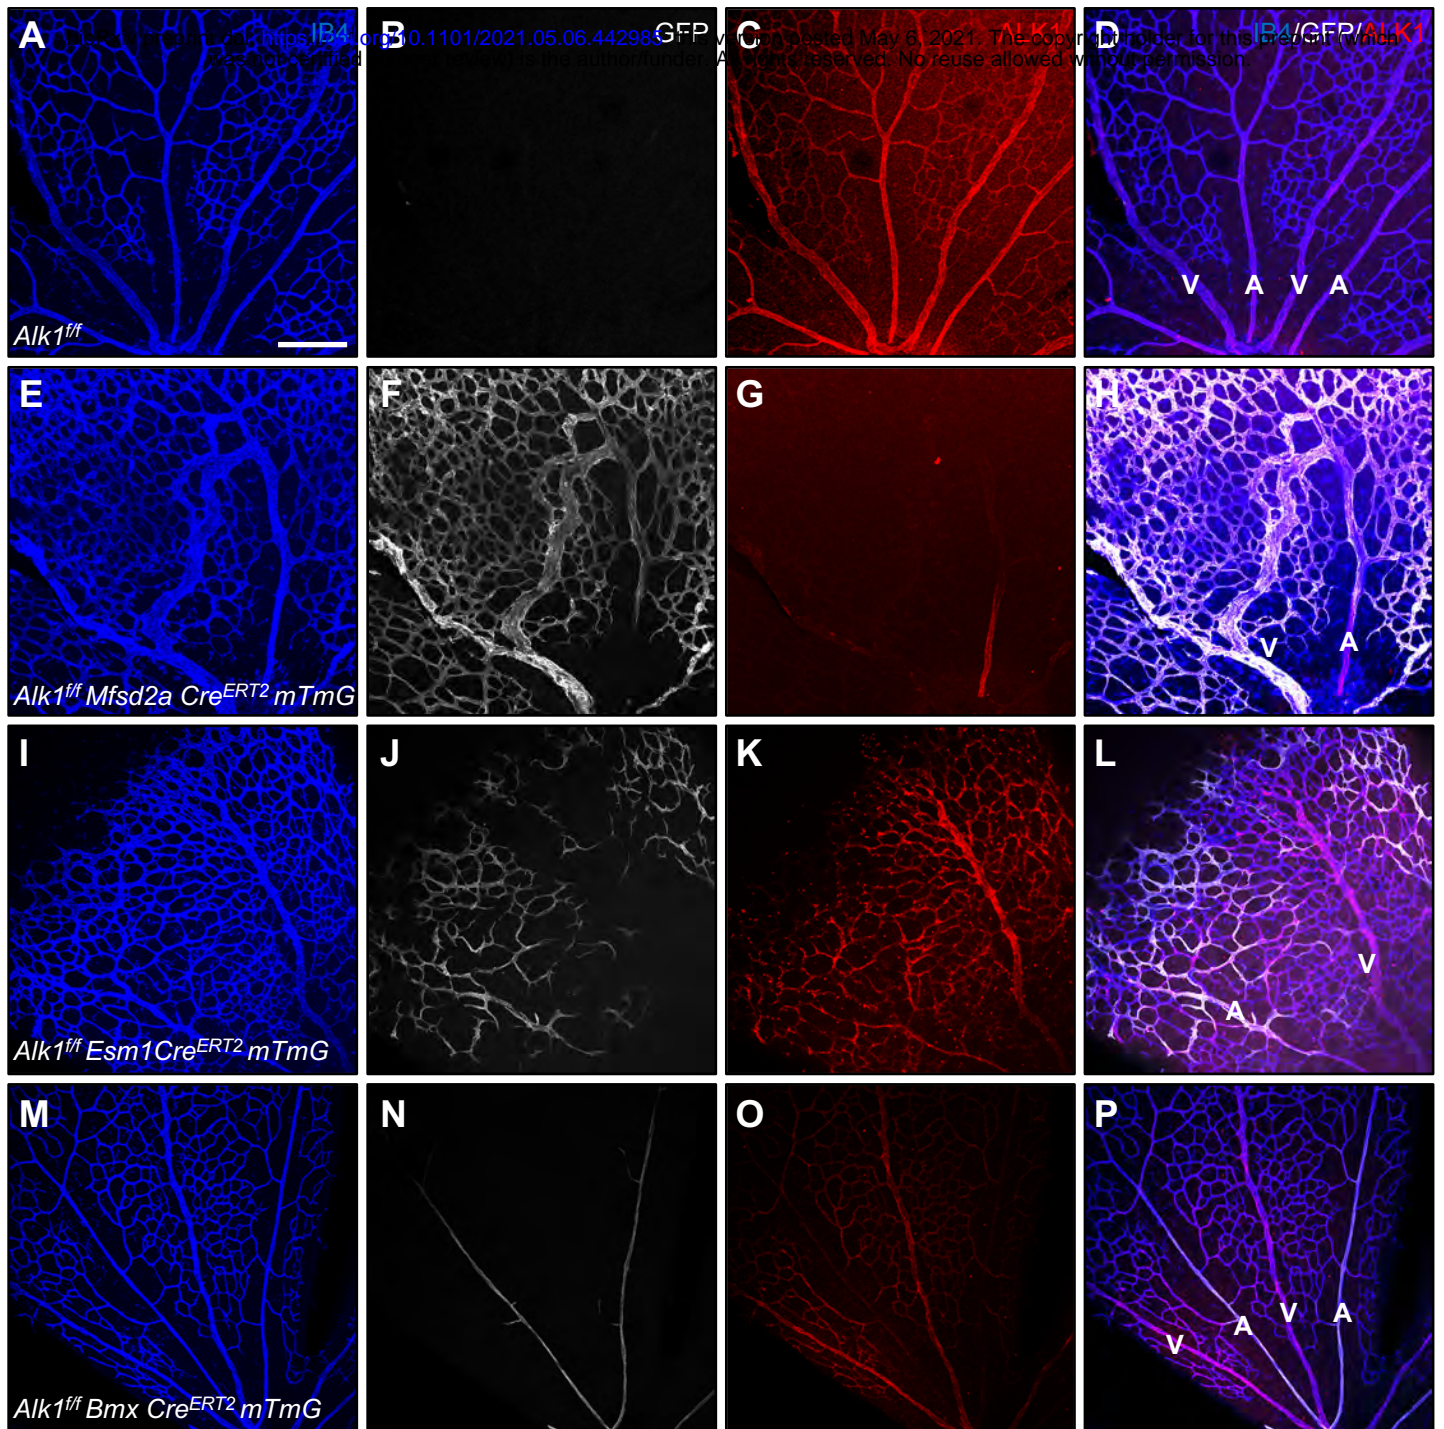

### Supplemental Figure 3

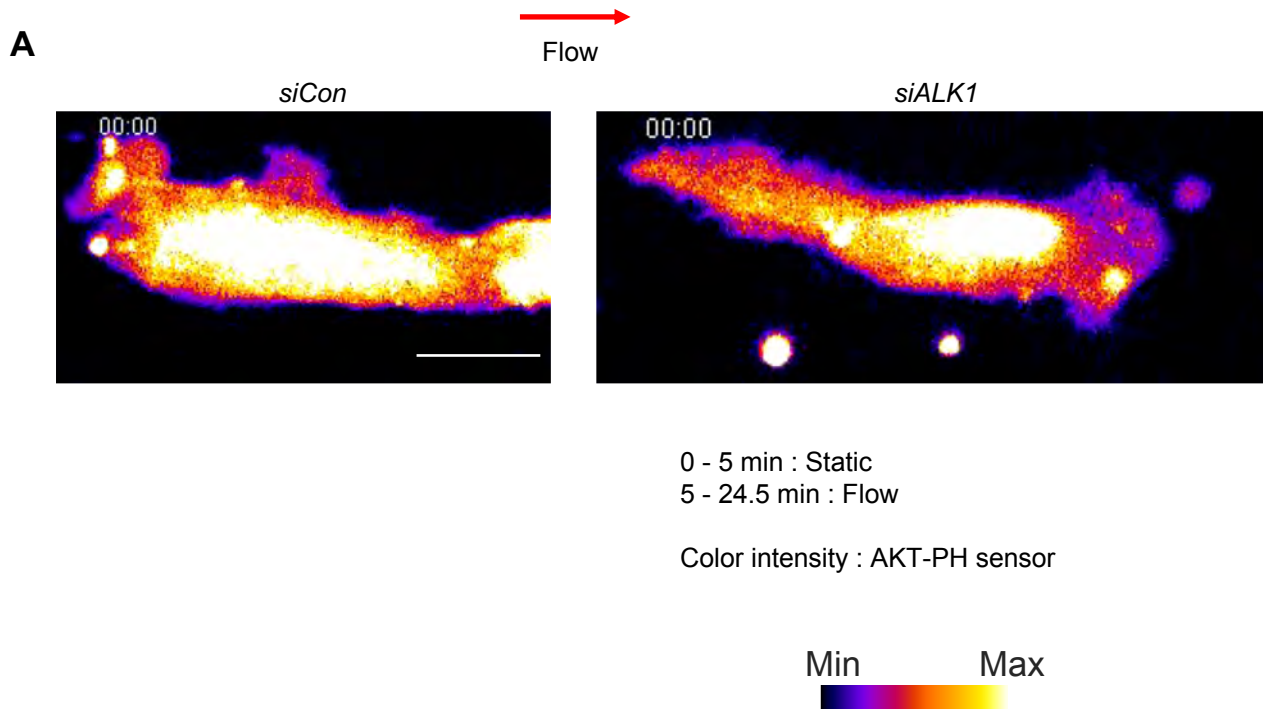

### Supplemental Figure 3. ALK1 regulates EC polarization against the direction of blood flow.

Movies of *siCon* or *siALK1* HUVECs stably transduced with PH-AKT-mClover3 and plasma membrane targeting sequence of LCK-mRuby3. HUVEC monolayers in microfluidic chambers were exposed to 12 dynes/cm<sup>2</sup> LSS under microscope. 0 – 5 min is static condition and flow starts after 5 min. Color intensity indicates AKT-PH sensor. A scale bar : 20  $\mu$ m

### Supplemental Figure 4

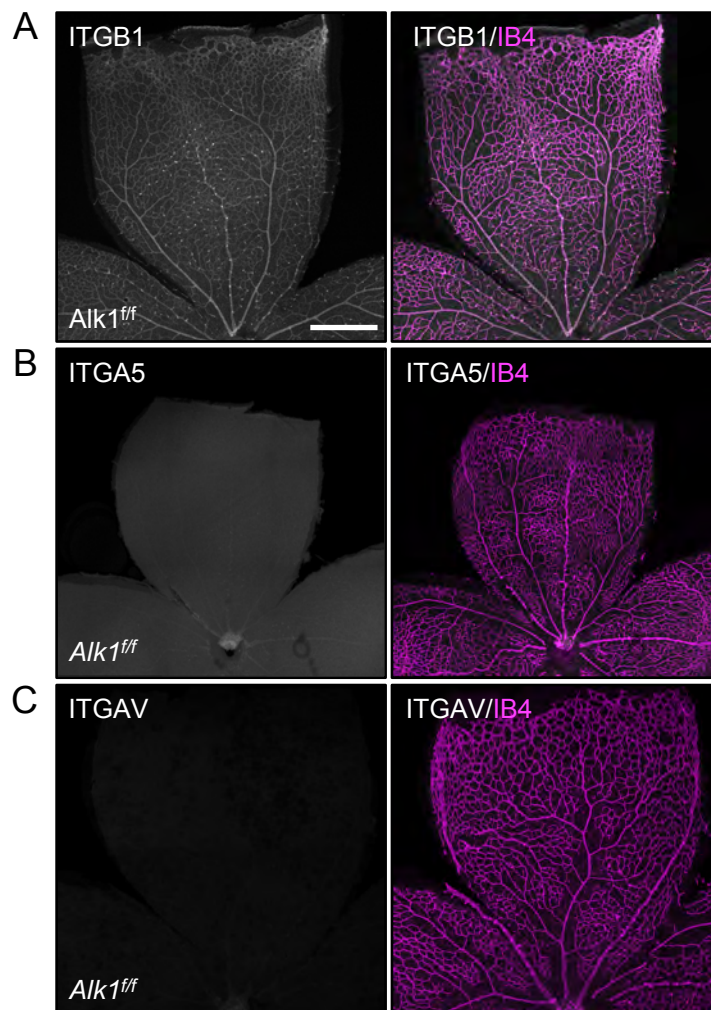

### Supplemental Figure 4. Integrin staining of *Alk1<sup>ff</sup>* retinas.

(A-C) IB4 (Magenta) and ITGB1(A, white), ITGA5 (B, white) or ITGAV (C, white) staining of retinal flat mounts from P8 *Alk1<sup>ff</sup>* pups. A scale bar : 500  $\mu$ m (A-C)

## Supplemental Figure 5

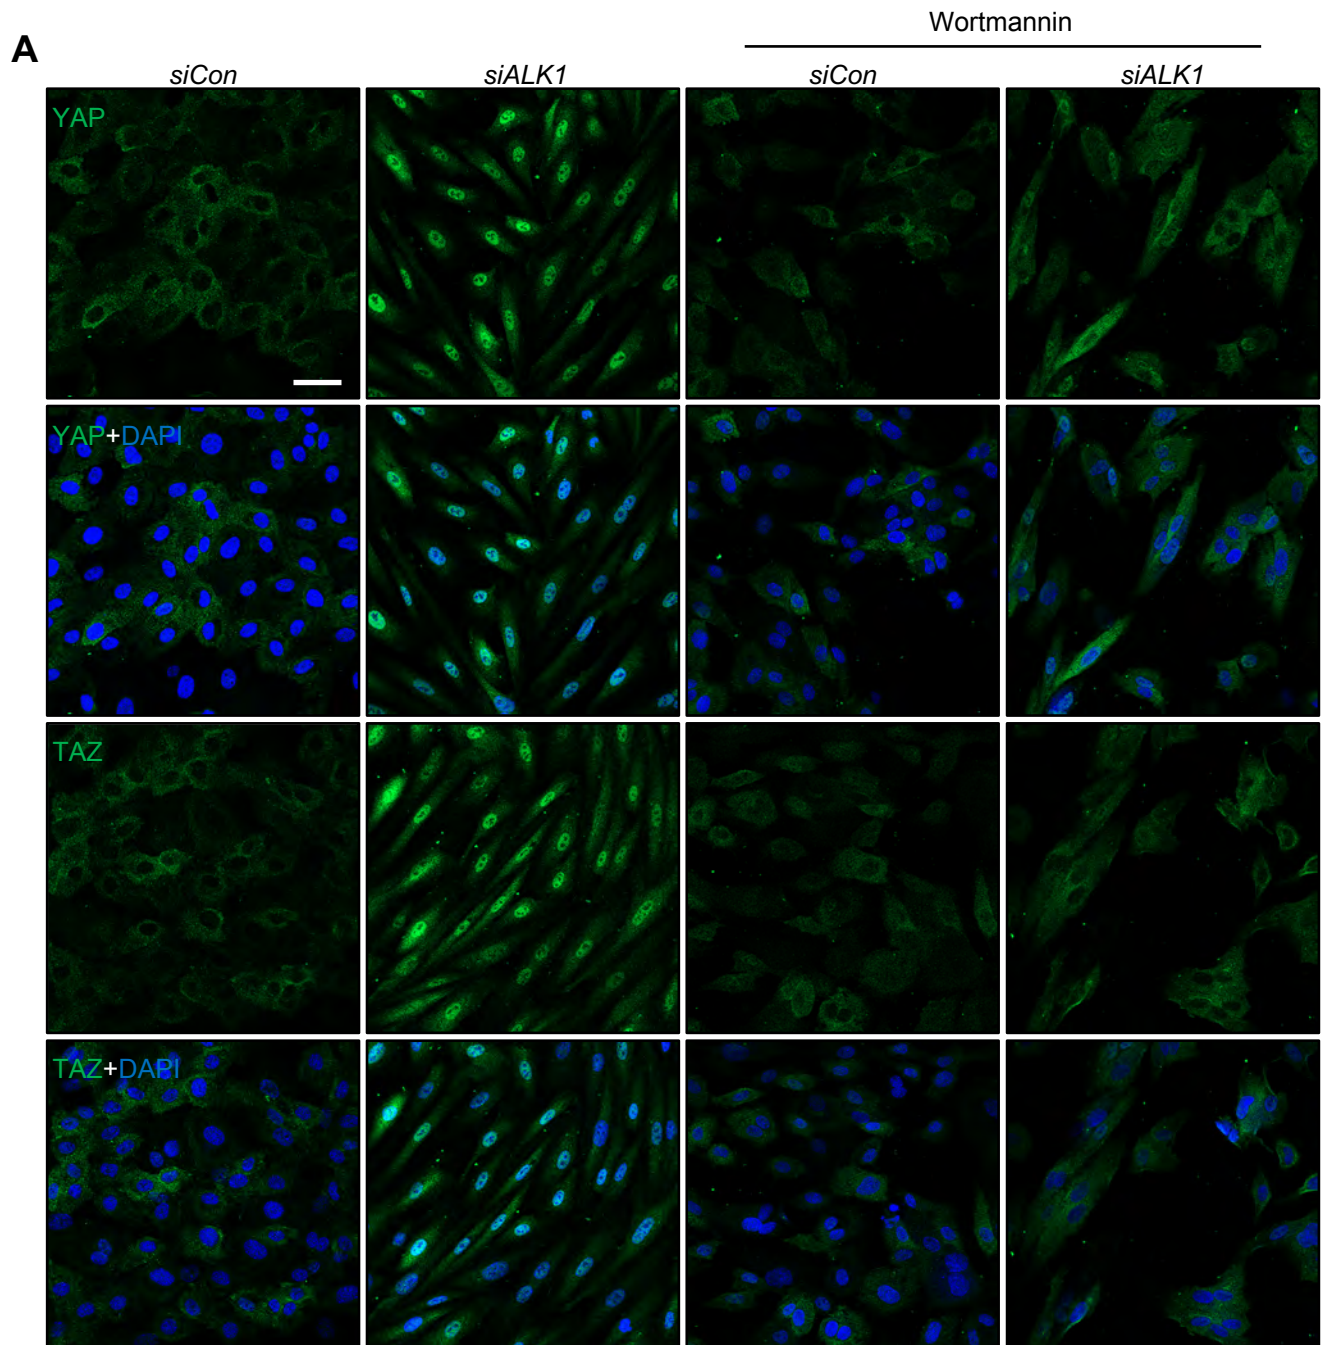

### Supplemental Figure 5. PI3K acts upstream of YAP/TAZ.

(A) YAP and TAZ staining for control, *ALK1* siRNAs transfected HUVECs treated with PBS, Wortmannin (100 nM) for 12 h. A scale bar: 50  $\mu$ m
